# Supplementary material for: Forecasting experiments of a dynamical-statistical model of the sea surface temperature anomaly field based on the improved self-memorization principle
Source: Copernicus journal article supplement (doi:10.5194/os-2017-78), 2017-11-07
Supplement: Supplementary file [file Forecasting of SSTfield-MeiHong-OS-1st revision-remark.pdf › Response file to reviewer2#/Forecasting of SSTfield-MeiHong-OS-1st revision-remark.pdf]

# Forecasting experiments of a dynamical-statistical model of the sea surface temperature anomaly field based on the improved self-memorization principle

Mei Hong<sup>1,2</sup>, ~~Ren Zhang<sup>1,2</sup>~~, ~~Xi Chen<sup>4</sup>~~, ~~Ren Zhang<sup>1,2</sup>~~, Dong Wang<sup>3</sup>, Shuanghe Shen<sup>2</sup>, ~~Xi Chen<sup>1</sup>~~, and Vijay P. Singh<sup>4</sup>

~~<sup>1</sup>Collaborative Innovation Center on Forecast and Evaluation of Meteorological Disaster, Nanjing University of Information Science & Technology, Nanjing 210044, China~~

~~<sup>2</sup>Institute~~ <sup>2</sup>Institute of Meteorology and Oceanography, National University of Defense Technology, Nanjing 211101, China

~~<sup>3</sup>Collaborative Innovation Center on Forecast and Evaluation of Meteorological Disaster, Nanjing University of Information Science & Technology, Nanjing 210044, China~~

<sup>3</sup>Key Laboratory of Surficial Geochemistry, Ministry of Education; Department of Hydrosociences, School of Earth Sciences and Engineering, Collaborative Innovation Center of South China Sea Studies, State Key Laboratory of Pollution Control and Resource Reuse, Nanjing University, Nanjing 210093, China

<sup>4</sup>Department of Biological and Agricultural Engineering, Zachry Department of Civil Engineering, Texas A & M University, College Station, TX 77843, USA

Corresponding authors address:

1. Ren Zhang, Research Centre of Ocean Environment Numerical Simulation,  
Institute of Meteorology and Oceanography, National University of Defense  
Technology, Nanjing 211101, China

E-mail: 254247175@qq.com

~~1,2.~~ Xi Chen, Research Centre of Ocean Environment Numerical Simulation, Institute  
of Meteorology and Oceanography, National University of Defense Technology,  
Nanjing 211101, China

E-mail: chenxigkd@163.com

~~2. Ren Zhang, Research Centre of Ocean Environment Numerical Simulation,  
Institute of Meteorology and Oceanography, National University of Defense  
Technology, Nanjing 211101, China~~

~~E-mail: [254247175@qq.com](mailto:254247175@qq.com)~~

**Abstract:** With the objective of tackling the problem of inaccurate long-term El Niño Southern Oscillation (ENSO) forecasts, this paper develops a new dynamical-statistical forecast model of sea surface temperature anomaly (SSTA) field. To avoid single initial prediction values, a self-memorization principle is introduced to improve the dynamic reconstruction model, thus making the model more appropriate for describing such chaotic systems as ENSO events. The improved dynamical-statistical model of the SSTA field is used to predict SSTA in the equatorial eastern Pacific and during El Niño and La Niña events. The long-term step-by-step forecast results and cross-validated retroactive hindcast results of time series  $T_1$  and  $T_2$  are found to be satisfactory, with a [pearson](#) correlation coefficient of approximately 0.80 and a mean absolute percentage error ([MAPE](#)) of less than 15%. The corresponding forecast SSTA field is accurate in that not only is the forecast shape similar to the actual field, but the contour lines are essentially the same. This model can also be used to forecast the ENSO index. The [temporal](#) correlation coefficient is 0.8062, and the MAPE value of 19.55% is small. The difference between forecast results in [summer-spring](#) and those in [winter-autumn](#) is not high,

indicating that the improved model can overcome the spring predictability barrier to some extent. Compared with six mature models published previously, the present model has an advantage in prediction precision and length, and is a novel exploration of the ENSO forecast method.

**Keywords:** Dynamical-statistical forecast model; self-memorization principle; sea surface temperature field; long-term forecast of ENSO

## 1. Introduction

The El Niño Southern Oscillation (ENSO), the well-known coupled atmosphere–ocean phenomenon, was firstly proposed by Bjerknes (1969). The ENSO phenomenon can influences regional and global climates, so the prediction of ENSO has received considerable public interest (Rasmusson and Carpenter, 1982; Glantz et al., 1991).

Over the past two to three decades, one might reasonably expect the ability to predict warm and cold episodes of ENSO at short and intermediate lead times to have gradually improved (Barnston et al., 2012). Many countries have been focusing on ENSO forecasts since the 1990s, and the ENSO forecast has become one of the important research topics in the International Climate Change and Predictability Research plan. The U.S. International Research Institute for Climate and Society, the U.S. Climate Prediction Centre, Japan Meteorological Agency, and European Centre for Medium-Range Weather Forecasting have developed different coupled atmosphere–ocean models to forecast ENSO (Saha et al., 2006; Molteni et al., 2007) .

The forecast models can generally be divided into two types (Palmer et al., 2004). The first type is typified by a dynamic model, which mathematically expresses physical laws that govern how the ocean and the atmosphere interact. The second type is typified by a statistical model, which requires large a amount of historical data and analyses the data to do forecasting (Chen et al., 1995; Moore et al., 2006).

Over the past three decades, ENSO predictions have made remarkable progress, reaching a stage where reasonable statistical and numerical forecasts (Jin et al., 2008) can be made 6–12 months in advance (Wang et al., 2009a). . However, there are three problems remaining to be resolved (Zhang et al., 2003a): (1) The current ENSO predictions are mainly limited to the short term, such as annual and seasonal predictions; (2) Although the representation of ENSO in coupled models has advanced considerably during the last decade, several aspects of the simulated climatology and ENSO are not well reproduced by the current generation of coupled models. The systematic errors in SST are often very large in the equatorial Pacific, and model representations of ENSO variability are often weak and/or incorrectly located (Neelin et al. 1992; Mechoso et al. 1995; Delecluse et al. 1998; Davey et al. 2002). (3) Coupled models of ENSO predictions initialized from observed initial states tend to adjust towards their own climatological mean and variability, leading to forecast errors. The errors associated with such adjustments tend to be more pronounced during boreal spring, which is often called the “spring predictability barrier” (Webster et al., 1999). More efficient models are therefore desired (Belkin and Niyogi, 2003; Weinberger and Saul, 2006). Therefore, the idea of combining

dynamical and statistical methods to improve weather and climate prediction has been developed in many studies ([Chou, 1974](#); Huang et al., 1993; Yu et al., 2014a; Yu et al., 2014b). By introducing genetic algorithms (GAs), Zhang et al. (2006) inverted and reconstructed a new dynamical-statistical forecast model of the tropical Pacific sea surface temperature (SST) field using historic statistical data (Zhang et al., 2008). However, there is one flaw in the forecast model: the time-delayed SST field. This is because ENSO is a complicated system with many influencing factors. To overcome information insufficiency in the forecast model, Hong et al. (2014) selected the tropical Pacific SST, SSW and SLP fields as three modelling factors and utilized the GA to optimize model parameters.

However, the above dynamical prediction equations which were proposed by Hong et al. (2014), greatly depend on a single initial value, creating long-term forecasts over 8 months that diverged significantly. These unsatisfactory results indicate that this model needs to be improved. Cao (1993) first proposed the self-memorization principle, which transforms the dynamical equations with the self-memorization equations, wherein the observation data can determine the memory coefficients. This method has been widely used in forecast problems in environmental, hydrological and meteorological fields (Feng et al., 2001; Gu, 1998; Chen et al., 2009). The method can avoid the question of initial conditions for the differential equations, so it can be introduced here to improve the proposed dynamical forecast model.

Therefore, an improved dynamical-statistical forecast model of the SST field

and its impact factors with a self-memorization function was developed. The improved model can absorb the information from past observations.

This paper is organized as follows: Research data and forecast factors are introduced in section 2. In Section 3 the reconstruction of the dynamical model of SSTA field is described. To improve the reconstruction model, the self-memorization principle is introduced in Section 4. Model forecast experiments are described in Section 5, and conclusions are given in Section 6.

## 2. Research data and forecast factors

### 2.1 Data

The monthly average SST data ~~from January 1951 to January 2010, 720 months in total,~~ were obtained from the UK Met Office Hadley Centre for the region (30°S-30°N; 120°E -90°W). The gridded 1° × 1° Met Office Hadley Sea Ice and SST dataset (HadISST1; Rayner et al. 2003) includes both in situ and available satellite data. The sea areas provide important information on ocean-atmosphere coupling in the East and West Pacific Ocean and the El Niño /La Niña events. The reanalysis data, zonal winds and sea level pressures were obtained from the National Center for Environmental Forecast of America and the National Center for Atmospheric Research (Kalnay et al., 1996). The sea surface height (SSH) field was obtained from Simple Ocean Data Assimilation (SODA) data (James and Benjamin, 2008). Outgoing longwave radiation (OLR) was obtained from the National Oceanic and Atmospheric Administration (NOAA) satellites, at a resolution of 0.5° × 0.5° (Liebmann and Smith, 1996).~~The sea areas provide important information on~~

ocean-atmosphere coupling in the East and West Pacific Ocean and the El Niño and La Niña events. The reanalysis data and zonal winds were obtained from the National Center for Environmental Forecast (NECP) of America and the National Center for Atmospheric Research (NCAR) (Kalnay et al., 1996). The Southern Oscillation Index (SOI) data were obtained from the Climate Prediction Center (CPC). The time series of all data were from Jan. 1951 to JanDec. 2010, 720 months in total.

## 2.2 EOF deconstruction

The sea surface temperature anomaly (SSTA) field can be calculated from the SST field and can be deconstructed into time (coefficients)-space (structure) using the empirical orthogonal function (EOF) method. Detailed information on the EOF method can be seen in the related references (Dommenget & Latif, 2002). We have used covariance matrix, because the covariance matrix was selected to diagnose the primary patterns of co-variability in the basin-wide SSTs, rather than the patterns of normalized covariance (or correlation matrix).

We used the smooths function with MATLAB to smooth the SSTA field before the EOF deconstruction, which is five points two times moving, mainly filtering out some noise points and outliers. Then a~~An empirical orthogonal function (EOF)~~ analysis of smoothed anomalies was performed, and the first two SSTA EOFs are shown in Figs. 1a and 1c. The principal component (PC) time series corresponding to the first and second EOFs are shown in Figs. 1b and 1d. The first EOF pattern, which accounted for 61.33% of the total SSTA variance, represented the mature ENSO phase

(El Niño or La Niña), and the corresponding PC time series was highly correlated (with a correlation coefficient of 0.85) with the cold tongue index (SST anomaly averaged over 4 °S–4 °N, 180 °–90 °W) over the whole period. The second EOF, accounting for 14.52% of the total SSTA variance, indicated the ENSO signal beginning to enhance~~the ENSO signal beginning to decay~~. Compared with the first mode, these were slightly attenuated in terms of the scope and intensity. The above analysis is similar to the EOF analysis of the SSTA field in the previous studies (Johnson et al., 2000; Timmermann et al., 2001). This indicates that the front two variance contribution modes can describe the main characteristics of the SSTA field and El Niño/La Niña. Therefore, we can choose the  $T_1, T_2$  time series EOF decomposition modes as the modelling objects.

### 2.3 Selection of other prediction model factors

Considering the complexity of computation, the amount of variables in the equations of our model can't be too large, usually 3 or 4 for the best. This has been explained in our previous studies (Zhang et al., 2006; Zhang et al., 2008). If there are more than 4 variables in the modeling equation, it will cause the amount of parameters such as  $a_1, a_2, \dots, a_n, b_1, b_2, \dots, b_n, \dots$  too large. The huge computation makes it difficult to be precisely modeled. Thus, the total number of parameters in the model of five variables was 102, which may cause an overfitting problem. Hence, when we selected the model of five or six variables which entailed large amounts of computation that made precision difficult, and too many parameters might cause an overfitting phenomenon. If we choose only two or even fewer variables, the forecast

带格式的: 字体: Times New Roman, 字体颜色: 自动设置

带格式的: 字体: Times New Roman, 字体颜色: 自动设置

带格式的: 字体: Times New Roman, 字体颜色: 自动设置



performance is poor too. Too few variables cause too small reconstructed parameters, resulting in amounts of important information missing out in the model. Thus, four variables are best for dynamically and accurately modeling. Because we have chosen two time series in section2.2 as the modeling objects, now we should select the other two ENSO intensity impact factors.

The ENSO intensity impact factor is an important issue in ENSO prediction. Previous studies have been completed in this area, which found that teleconnection patterns, temperature, precipitation, wind and SSH may affect ENSO strength. For example, Trenberth et al. (1998) noted that PNA, SOI and OLR in the Pacific Intertropical Convergence Zone (ITCZ) are all closely related to ENSO. Webster(1999) pointed out after the 1970, Indian Ocean dipole (IOD) is not only affected by ENSO, but also affected the strength of ENSO (Ashok et al., 2001). Yoon and Yeh (2010) reported that the Pacific Decadal Oscillation (PDO) disrupts the linkage between El Niño and the following Northeast Asian summer monsoon (NEASM) through inducing the Eurasian pattern in the mid-high latitudes. The vast majority of studies (Tomita and Yasunari, 1996; Zhou and Wu, 2010; Kim et al., 2017) have concentrated on the impacts of ENSO on the East Asian winter monsoon( EAWM). During the EAWM season, ENSO generally reaches its mature phase and has the most prominent impact on the climate. Wang et al. (1999a) and Wang et al. (1999b) suggested that the zonal wind factors in the eastern and western equatorial Pacific play a critical role in the phase of transition of the ENSO cycle, which could excite eastward propagating Kelvin waves and affect the SSTA in the

带格式的：字体：(默认) Times New Roman, 字体颜色：自动设置

带格式的：字体：Times New Roman, 字体颜色：自动设置

equatorial Pacific. Zhao et al. (2012) analyzed the characteristics of the tropical Pacific SSH field and its impact on ENSO events.

Based on the above analysis, we have selected nine factors, which may be closely related with the ENSO index (Niño3.4).

(1) The zonal wind in the eastern equatorial Pacific factor ( $u_1$ ) was calculated as the grid-point average of zonal wind in the area  $[5^\circ\text{S} \sim 5^\circ\text{N}, 150^\circ\text{W} \sim 90^\circ\text{W}]$ .

(2) The zonal wind in the western equatorial Pacific factor ( $u_2$ ) was calculated as the grid-point average of zonal wind in the area  $[0^\circ \sim 10^\circ\text{N}; 135^\circ\text{E} \sim 180^\circ\text{E}]$ .

(3) The PNA teleconnection factor was obtained from the CPC.

(4) the dipole mode index factor (DMI) was obtained from SSTA for June-July-August (JJA) based on Saji(1999) method.

(5) The SOI factor was obtained from the CPC.

(6) The PDOI factor was obtained from department of Atmospheric Sciences in the university of Washington. The web is <http://tao.atmos.washington.edu/pdo/RDO.latest>.

(7) The EAWM index (EAWMI) factor was proposed by Yang et al. (2002), which is defined by the meridional 850-hPa winds averaged over the region  $(20^\circ \sim 40^\circ\text{N}, 100^\circ \sim 140^\circ\text{E})$ .

(8) The OLR in the ITCZ factor was calculated as the grid-point average of OLR in the area  $[10^\circ\text{N} \sim 20^\circ\text{N}, 120^\circ\text{E} \sim 150^\circ\text{E}]$ .

(9) The SSH factor was calculated as the grid-point average of the SSH data in the area  $[10^\circ\text{S} \sim 10^\circ\text{N}; 120^\circ\text{E} \sim 60^\circ\text{W}]$ .

带格式的: 字体: Times New Roman, 字体颜色: 自动设置

A correlation analysis of the above factors was carried out and the results are shown in Table 1.

Table 1 shows that SOI and EAWMI have the stronger correlation with the front two time series  $T_1, T_2$  than the other 7 factors. The results are also consistent with previous research (Clarke and Van Gorder, 2003; Drosowsky, 2006; Zhang et al., 1996; Wang et al., 2008; Yang and Lu, 2014). Therefore, the first time series  $T_1$ , the second time series  $T_2$ , SOI and EAWMI will be selected as prediction model factors.

The ENSO intensity impact factor is an important issue in the ENSO prediction. Previous studies have found that teleconnection patterns, temperature, precipitation, wind and SSH may affect the ENSO strength (Trenberth et al., 1998; Webster, 1999; Ashok et al., 2001; Yoon and Yeh, 2010; Tomita and Yasunari, 1996). For example, Trenberth et al. (1998) noted that the Pacific North American Oscillation Index (PNA) and SOI in the Pacific Intertropical Convergence Zone (ITCZ) were all closely related to ENSO. Liao et al. (2007) also noted that the decadal variation during ENSO events had a close relationship with the SOI index. The vast majority of studies (Tomita and Yasunari, 1996; Zhou and Wu, 2010) have concentrated on the impacts of ENSO on the East Asian winter monsoon (EAWM). During the EAWM season, ENSO generally reaches its mature phase and has the most prominent impact on the climate. Wang et al. (1999a) and Wang et al. (1999b) suggested that the zonal wind factors in the eastern and western equatorial Pacific played a critical role in the transition phase of the ENSO cycle, which could excite eastward propagating Kelvin waves and affect the SSTA in the equatorial Pacific.

带格式的: 字体: Times New Roman, 字体颜色: 自动设置

带格式的: 字体: (默认) Times New Roman, 字体颜色: 自动设置

带格式的: 字体: (默认) Times New Roman, 字体颜色: 自动设置

带格式的: 字体: (默认) Times New Roman, 字体颜色: 自动设置

带格式的: 字体: Times New Roman, 字体颜色: 自动设置

Based on the above analysis, we selected four factors, which may be closely related with the ENSO index (Niño 3.4) and were obtained as follows:

(1) The zonal wind in the eastern equatorial Pacific factor ( $u_1$ ) was calculated as the grid point average of zonal wind in the area  $[5^\circ\text{S} \sim 5^\circ\text{N}, 150^\circ\text{W} \sim 90^\circ\text{W}]$ .

(2) The PNA teleconnection factor was obtained from the CPC.

(3) The SOI factor was obtained from the CPC.

(4) The EAWM index (EAWMI) factor was proposed by Yang et al. (2002), which is defined by the meridional 850 hPa winds averaged over the region  $(20^\circ \sim 40^\circ\text{N}, 100^\circ \sim 140^\circ\text{E})$ .

All the four data selected ranged from January 1951 to January 2010.

Actually, how many variables and which variables are used in our model become a key issue to be resolved. We can introduce a stepwise regression principle to choose more reasonable predictors (Yim et al., 2015), because the stepwise procedure can help selecting statistically important predictors at each step. The significance of each predictor selected was based on its significance in increasing the regressed variance by the standard  $F$  test (Panofsky and Brier, 1968). A 95 % statistical significance level was used as a criterion to select a new predictor at each step. Once selected into the model, a predictor can only be removed if its significance level falls below 95 % by the addition/removal of another variable. For example, for the model of only one variable, because we forecast the ENSO index, we should choose  $T_1$  or  $T_2$  as the variable. Considering that  $T_1$  accounts for 61.33% of the total SSTA variance, so we chose  $T_1$  as the variable. For the model of two variables, there

are five factors ( $T_2, u_1$ , PNA, SOI and EAWMI) which can be chosen for the second variable. Taking advantage of the stepwise regression ideas and selecting statistically important predictors by a standard F test, we can find the largest F test value among the five factors. That is  $T_2$ . Continuing this step, we can also select the reasonable factors for the model of three variables. Based on this thought, when the number of variables is determined, we can choose the most statistically important variables to reconstruct the prediction model. The forecast results of these models can be seen in table 1.

From table 1, the forecast results of all six models are satisfactory, where the temporal correlations of the models are all greater than 0.60 and the root mean square errors are all less than 0.81. Among all six models, the forecast results of four variables are the best for the following reasons:

(1) In general, the amount of parameters is less than 10% of the sample size, which can avoid over fitting (Tetko et al., 1995). The number of parameters  $a_1, a_2, \dots, a_{14}, b_1, b_2, \dots, b_{14}, c_1, c_2, \dots, c_{14}, d_1, d_2, \dots, d_{14}$  of the model of four variables  $T_1, T_2, SOI, EAWMI$  is 56, but we deleted the parameters which contributed little to the prediction. That means that there are 56 parameters in equation (1) in section 3, but there are only 34 parameters in equation (3) in section 3 which is our final prediction equation. In section 5.1, because  $p$  is identified as 6, the number of parameters of the self-memorization function  $\rho_i$  is 28. Therefore, the total number of parameters in the model of four variables is 62, which is less than 10% of the sample size (720 months). The number of parameters  $a_1, a_2, \dots, a_{20}, b_1, b_2, \dots, b_{20}, c_1, c_2, \dots, c_{20}, d_1, d_2, \dots, d_{20}, e_1, e_2, \dots, e_{20}$  of the model

of five variables  $T_1, T_2, SOI, EAWMI, u_t$  is 100. Although the parameters which contributed a little were deleted, the number was still 72, and the number of self memorization parameters was 30 ( $p$  determined as 5). Thus, the total number of parameters in the model of five variables was 102, which was more than 10% of the sample size (720 months). This will cause an overfitting problem. Hence, when we selected the model of five or six variables which entailed large amounts of computation that made precision difficult, and too many parameters caused an overfitting phenomenon. That is why the forecast results of five or six variables were worse than those of four variables.

(2) The models of one, two and three variables can avoid the overfitting problem, but too few variables will result in too few reconstruction parameters, causing important information missing from the model. Especially, when the model of one or two variables was considered, we only studied the self memorization of the ENSO system but did not consider the mutual memorization between factors. Thus, equations of our model only contained a self-memory term, not an exogenous effect term. That is why the forecast results of one, two and three variables were worse than those of four variables.

Based on the above analysis, we finally chose  $T_1, T_2, SOI$  and EAWMI as predictors for the model.

### 3. Reconstruction of dynamical model based on GA

Takens' delay embedding theorem (Takens, 1981) provides the conditions under which a smooth attractor can be constructed from observations made with a generic

function. Later results replaced the smooth attractor with a set of arbitrary box-counting dimensions and the class of generic functions with other classes of functions. Takens had shown that if we measured any single variable with sufficient accuracy for a long period of time, it would be possible to construct the underlying dynamical structure of the entire system from the behavior of that single variable using delay coordinates and the embedding procedure. It was therefore possible to construct a dynamical model of system evolution from the observed time series. Introducing this idea here, four time series of the  $T_1$ ,  $T_2$ , SOI and EAWMI factors were chosen to construct the dynamical model.

The basic idea of statistical-dynamical model construction is discussed in Appendix A and was introduced in our previous work (Zhang et al., 2006; Hong et al., 2014).

A simplified second-order nonlinear dynamical model can be used to depict the basic characteristics of atmosphere and ocean interactions (Fraedrich, 1987). Suppose that the following nonlinear second-order ordinary differential equations are taken as the dynamical model of reconstruction. In the equations,  $x_1, x_2, x_3, x_4$  were used to represent the time coefficient series of  $T_1$ ,  $T_2$ , SOI and EAWMI.

$$\begin{aligned}\frac{dx_1}{dt} &= a_1x_1 + a_2x_2 + a_3x_3 + a_4x_4 + a_5x_1^2 + a_6x_2^2 + a_7x_3^2 + a_8x_4^2 + a_9x_1x_2 + a_{10}x_1x_3 + a_{11}x_1x_4 + a_{12}x_2x_3 + a_{13}x_2x_4 + a_{14}x_3x_4 \\ \frac{dx_2}{dt} &= b_1x_1 + b_2x_2 + b_3x_3 + b_4x_4 + b_5x_1^2 + b_6x_2^2 + b_7x_3^2 + b_8x_4^2 + b_9x_1x_2 + b_{10}x_1x_3 + b_{11}x_1x_4 + b_{12}x_2x_3 + b_{13}x_2x_4 + b_{14}x_3x_4 \\ \frac{dx_3}{dt} &= c_1x_1 + c_2x_2 + c_3x_3 + c_4x_4 + c_5x_1^2 + c_6x_2^2 + c_7x_3^2 + c_8x_4^2 + c_9x_1x_2 + c_{10}x_1x_3 + c_{11}x_1x_4 + c_{12}x_2x_3 + c_{13}x_2x_4 + c_{14}x_3x_4 \\ \frac{dx_4}{dt} &= d_1x_1 + d_2x_2 + d_3x_3 + d_4x_4 + d_5x_1^2 + d_6x_2^2 + d_7x_3^2 + d_8x_4^2 + d_9x_1x_2 + d_{10}x_1x_3 + d_{11}x_1x_4 + d_{12}x_2x_3 + d_{13}x_2x_4 + d_{14}x_3x_4\end{aligned}$$

332

(1)

333

Based on the parameter optimization search method of GA in Appendix A, the

334

time coefficient series of  $T_1$ ,  $T_2$ , SOI and EAWMI from January 1951 to April 2008

335

are chosen as the expected data to optimize and retrieve model parameters. In order to

336

eliminate the dimensionless relationship between variables, data standardization is to

337

transform data from different orders of magnitude to the same order of magnitude,

338

thus making the data comparable. So we used  $x_{nor} = \frac{x - x_{min}}{x_{max} - x_{min}}$  to normalize the raw

339

value of each of the four predictors, then we used the normalized value to model and

340

forecast. To avoid the overfitting problem, we used  $x_{nor} = \frac{x - x_{min}}{x_{max} - x_{min}}$  to normalize

341

the raw value of each of the four predictors, then we used the normalized value to

342

model and forecast. Finally, we made forecast results revert back to the raw data

343

magnitude by  $x = x_{nor}(x_{max} - x_{min}) + x_{min}$ .

344

In order to quantitatively compare the relative contribution of each item of our

345

model to the evolution of the system, we calculated the relative variance contribution.

346

The formula is as follows:  $R_i = \frac{1}{n} \sum_{j=1}^n [\frac{T_i^2}{\sum_{i=1}^{14} T_i^2}]$ ,  $i = 1, 2, \dots, 14$ , Where n is the length of

347

the data,  $T_i = a_1 x_1, a_2 x_2, \dots, a_{14} x_{14}$  is the item in the equation. According to our

348

previous research (Hong et al., 2007), the variance contribution of the real item

349

reflecting the performance of the model has a large proportion, while the variance

350

contribution of the false term is almost zero, so we delete the weak items of

351

$R_i < 0.01$ .

带格式的: 字体: 小四, 字体颜色: 自动设置

带格式的: 字体颜色: 自动设置

带格式的: 字体: 小四, 字体颜色: 自动设置

带格式的: 字体颜色: 自动设置

带格式的: 字体: Times New Roman, 小四

带格式的: 缩进: 左侧: 0 厘米, 首行缩进: 2 字符

带格式的: 字体: Times New Roman, 小四

带格式的: 字体: Times New Roman, 小四

带格式的: 字体: Times New Roman

带格式的: 字体: Times New Roman, 字体颜色: 自动设置

带格式的: 字体: Times New Roman

带格式的: 字体: Times New Roman, 小四

带格式的: 字体: Times New Roman

带格式的: 字体: Times New Roman, 小四



After deleting the weak items~~eliminating weak items with small dimension~~  
coefficients, the nonlinear dynamical model of the first time series  $T_1$ , the second time  
series  $T_2$ , SOI and EAWMI can be reconstructed as follows:

$$\begin{aligned}\frac{dx_1}{dt} &= F_1 = -0.3328x_1 + 1.2574x_2 - 0.3511x_3 - 0.0289x_1^2 + 3.1280x_3^2 + 0.0125x_1x_2 + 2.7805x_1x_3 - 1.5408x_2x_4 \\ \frac{dx_2}{dt} &= F_2 = 1.0307x_1 - 3.1428x_2 + 0.3095x_4 + 4.2301x_1^2 - 1.2066x_2^2 + 2.5024x_4^2 - 0.2891x_1x_3 + 0.7815x_1x_4 - 0.4266x_3x_4 \\ \frac{dx_3}{dt} &= F_3 = -2.3155x_1 + 3.2166x_3 + 1.5284x_4 - 1.4527x_2^2 - 0.0034x_3^2 - 4.1206x_4^2 - 0.0025x_1x_4 + 0.0277x_2x_3 + 1.2860x_2x_4 \\ \frac{dx_4}{dt} &= F_4 = 0.4478x_2 - 0.0268x_4 + 0.8995x_1^2 - 2.3890x_3^2 + 0.2037x_4^2 + 1.3035x_1x_2 + 2.0458x_1x_4 - 2.0015x_2x_4\end{aligned}\quad (2)$$

~~The appropriate model coefficient estimates determine the robustness of the  
model and the accuracy of forecast results. We should now judge whether the model  
coefficients are appropriate or not.~~

~~Frist, the largest Lyapunov exponent (LLE) is one of the indexes that can  
represent the characteristics of chaotic systems. The final Lyapunov exponents of Eq.  
(2) were [0.0433, -0.0012, -0.1285], containing both a negative Lyapunov exponent  
and two positive Lyapunov exponents, which demonstrate that our dynamic system is  
indeed a chaotic system.~~

~~Second, we calculated the equilibrium roots of Eq. (2). Only the third  
equilibrium was adjudged to be stable, based upon higher order terms within the  
Taylor series, the indices of which were mostly in accordance with the actual weather  
system. The indices in the unstable equilibria could not accurately describe the actual  
weather. Based on these two aspects, we can see that the model coefficient estimates  
were reasonable and reflected the dynamical characteristics of the model.~~

The model required testing. Because the training period was from January 1951

to April 2008, we chose  $T_1$ ,  $T_2$ , SOI and EAWMI of May 2008, which were not used as initial forecast data in the modeling. Next, the Runge–Kutta method was used to do the numerical integration of the above equations, and every step of the integration was regarded as 1 month's worth of forecasting results. As a result, forecast results of four time series over a period of 20 months were obtained. Here, the focus was on the forecast results of  $T_1$  and  $T_2$ , as shown in Fig.2.

The pearson correlation coefficient (CC) (Wang et al. 2009b) and the mean absolute percentage error (MAPE) (Hu et al. 2001) are employed as objective functions to calibrate the model. The CC evaluates the linear relationship between the observed and predicting values and MAPE measures the difference between the observed and predicting values.

From Fig. 2, forecast performance of  $T_1$  and  $T_2$  within 5 months was better.

Using  $T_1$  as an example, ~~the at this time, CC the temporal correlation~~ between model predictions and corresponding observations over the first five months forecasts was 0.8966 and ~~the mean absolute percentage error (MAPE) (Hu et al.,~~

~~2001),~~  $MAPE = \frac{1}{n} \sum_{i=1}^n \left| \frac{D_e(i) - D_0(i)}{D_0(i)} \right| \times 100, (n=5),$  was 8.32%. However, after 5

months, MAPE increased rapidly, and was 31.29% at 10 months. The model forecast then significantly diverged from observations, and the forecast became inaccurate.

After 10 months, the forecast results became increasingly worse, which indicated that the forecast of the model after 5 months was unacceptable. The forecast results of  $T_2$  were similar to those of  $T_1$ .

The model's skill should be further assessed by cross-validated retroactive

hindcasts of the time series. As in the above example, omitting a portion of the time series (12 months, January-Jan. 1951 to January-Dec. 1951) from observations, we trained the model based on the data from February-Jan. 1952-1951 to December-Dec. 2010, and then predicted the omitted segments (12 months, Jan. 1951 to Dec. 1951). Then in the next prediction experiment, the omitted segment is Jan.1952 to Dec. 1952 and the training samples are Jan. 1951 to Dec.1951 and Jan.1953 to Dec.2010. So the forecast time series is Jan.1952 to Dec. 1952. We then repeated this procedure by moving the omitted segment along the entirety of the available time series. Each experiment ~~have~~has used the different training sample and have established the different model equation (but the method is the same). The similar process of the cross-validated retroactive hindcasts has also been used in the previous literatures (Hu et al., 2017).

Finally, we obtained cross-validated retroactive hindcast results of  $T_1$  and  $T_2$ , as shown in Fig. 3. So the forecast results of 60 cross experiment (each experiment is the prediction of the 12 month as Fig.2) according to the time sequence can merger into a new time series (from Jan.1951-Dec.2010), and then the pearson correlation coefficient (CC) and the mean absolute percentage error (MAPE) can be calculated by the new prediction time series and the time series of the actual value. Figure 3 is combined results of the 60 forecast experiments.

As Fig. 2, the forecast performance of  $T_1$  and  $T_2$  in Fig. 3 was not satisfactory. The model forecast significantly diverged from observations, and the forecast became inaccurate. The ~~temporal correlations~~CC of  $T_1$  and  $T_2$  between model predictions and corresponding observations were 0.3411 and 0.4176, respectively. Additionally, the

带格式的: 字体: Times New Roman, 字体颜色: 自动设置, 英语(英国)

mean absolute percentage errors (MAPE) of  $T_1$  and  $T_2$  were 65.42% and 57.56%, respectively. This indicates that the forecast of the model in the long-term was inaccurate and unacceptable.

The forecast result may be inaccurate when the integral forecasting time is long. There will be a significant divergence which will cause an ineffective forecast. To improve the forecast accuracy, the forecast not only depends on the integral equation but also on a single initial value. Choosing the different initial value will cause different forecast accuracy. For example, in a total of 60 cross-validated retroactive hindcasts examples, the minimum MAPE was 37.65%, while the maximum MAPE was 89.88%. A forecast, depending on a single initial value, will cause instability of the forecast results. These two problems are addressed by introducing the self-memorization principle in the next section.

#### **4. Introduction of self-memorization dynamics to improve the reconstructed model**

In the above discussion, it was shown that the accuracy of the forecast results of equation (2) were unsatisfactory. To improve long-term forecasting results, the principle of self-memorization can be introduced into the mature model (Gu, 1998; Chen et al., 2009). The principle of self-memorization dynamics (Cao, 1993; Feng et al., 2001) can be seen in Appendix B.

Based on Eq. (B10) in Appendix B, the improved model can be expressed as

438

$$\text{follows: } \begin{cases} x_{1t} = \sum_{i=-p-1}^{-1} \alpha_{1i} y_{1i} + \sum_{i=-p}^0 \theta_{1i} F_1(x_{1i}, x_{2i}, x_{3i}, x_{4i}) \\ x_{2t} = \sum_{i=-p-1}^{-1} \alpha_{2i} y_{2i} + \sum_{i=-p}^0 \theta_{2i} F_2(x_{1i}, x_{2i}, x_{3i}, x_{4i}) \\ x_{3t} = \sum_{i=-p-1}^{-1} \alpha_{3i} y_{3i} + \sum_{i=-p}^0 \theta_{3i} F_3(x_{1i}, x_{2i}, x_{3i}, x_{4i}) \\ x_{4t} = \sum_{i=-p-1}^{-1} \alpha_{4i} y_{4i} + \sum_{i=-p}^0 \theta_{4i} F_4(x_{1i}, x_{2i}, x_{3i}, x_{4i}) \end{cases} \quad (3)$$

439

where  $y_i$  is replaced by the mean of two values at adjoining times; i.e.,

440

$y_i \equiv \frac{1}{2}(x_{i+1} + x_i)$ ;  $F$  is the dynamic core of the self-memorization equation, which

441

can be obtained from Eq. (2); and  $\alpha$  and  $\theta$  are the memory coefficients, the formula

442

for which can be found in Appendix B.

443

If the values of  $\alpha$  and  $\theta$  can be obtained, Eq. (3) can be used to obtain the

444

results of final prediction. The memory coefficients  $\alpha$  and  $\theta$  in Eq. (3) were

445

calibrated using the least-squares method with the same data (January 1951 to April

446

2008) as those used in Section 3. Eq. (3) can be deconstructed as follows ( $M$  is the

447

length of the time series):

448

$$X = \begin{bmatrix} x_{11} \\ x_{12} \\ \vdots \\ x_{1M} \end{bmatrix}, \alpha = \begin{bmatrix} \alpha_{-p-1} \\ \alpha_{-p} \\ \vdots \\ \alpha_{-1} \end{bmatrix}, Y = \begin{bmatrix} y_{-p-1,1} & y_{-p,1} & \cdots & y_{-1,1} \\ y_{-p-1,2} & y_{-p,2} & \cdots & y_{-1,2} \\ \vdots & \vdots & & \vdots \\ y_{-p-1,M} & y_{-p,M} & \cdots & y_{-1,M} \end{bmatrix}, \Theta = \begin{bmatrix} \theta_{-p} \\ \theta_{-p+1} \\ \vdots \\ \theta_0 \end{bmatrix},$$

449

$$F = \begin{bmatrix} F_{-p,1} & F_{-p+1,1} & \cdots & F_{0,1} \\ F_{-p,2} & F_{-p+1,2} & \cdots & F_{0,2} \\ \vdots & \vdots & & \vdots \\ F_{-p,M} & F_{-p+1,M} & \cdots & F_{0,M} \end{bmatrix}$$

The matrix equation is:

$$X = Y\alpha + F\theta \quad (4)$$

where  $Z = [Y:F]$ ,  $W = \begin{bmatrix} \alpha \\ \theta \end{bmatrix}$ .

Eq. (4) can be written as:

$$X = ZW \quad (5)$$

The memory coefficients vector  $W$  can be calibrated using the least squares method:

$$W = (Z^T Z)^{-1} Z^T X \quad (6)$$

The memory coefficients  $\alpha, \theta$  can be obtained from Eq. (6). We then made a prediction using the self- memorization equation (3), which used the  $p$  values before  $t_0$ .

The coefficients in  $F$  and  $W$  were used with the same training data from January 1951 to April 2008. In the forecast examples, we trained both the coefficients in  $F$  and  $W$  at the same time, but in the paper we describe them separately to facilitate the reader for better understanding.

## 5. Model prediction experiments

### 5.1 Forecast of time series $T_1$ and $T_2$

The training sample for the model was from January 1951 to April 2008. Here, from Eq. (3), the forecast results using  $T_1, T_2$ , SOI and EAWMI factors can be calculated, called as step-by-step forecast.

When the retrospective order  $p$  is confirmed, step-by-step forecasts can be

carried out. For example, when the  $T_1, T_2$ , SOI and EAWMI values of May 2008 were forecast,  $y_i$  was obtained from the previous  $p+1$  time of  $T_1, T_2$ , the SOI and the EAWMI data, and  $F_i(x_{1i}, x_{2i}, x_{3i}, x_{4i})$  was obtained from the previous  $p$  times of  $T_1, T_2$ , the SOI and the EAWMI data. All four equations were integrated simultaneously. Taking these in Eq. (3), we can get the  $T_1, T_2$ , SOI and EAWMI values of May 2008, which these can be taken as the initial values for the next prediction step. Then, the  $T_1, T_2$ , SOI and EAWMI values from June 2008 and so on, can be generated.

#### 5.1.1 Determination of $p$

Based on the self-memorization principle, the self-memorization of the system determines the retrospective order  $p$  (Cao, 1993). If the system forgets slowly, parameters  $a$  and  $\theta$  will be small and the  $p$  value should be high. The SSTA field forecasts were on a monthly scale, the change of which was slow in contrast to large-scale atmospheric motion. So parameters  $a$  and  $\theta$  were small, and generally, the  $p$  value was in the range 5 to 15.

The retrospective order  $p$  was obtained by a trial calculation method. We selected the  $p$  values in the range 4 to 16 to construct the model. The correlation coefficients  $CC$  ( $CC$ ) and MAPE of long-term fitting test (from February 1951 to December 2010) are shown in Table 2, which can be used as the standard to determine the retrospective order  $p$ .

Table 2 indicates that when  $p=6$ , the MAPE values of long-term fitting test were the smallest and the correlation coefficients  $CCs$  were the largest. Also, when  $p$  from 5 to 9,  $CCs$  The  $CCs$  were all more than 0.58 and the forecast results were all

good, which is consistent with our interpretation of the physical mechanisms in section 6.2 below. SOI and EMWMI were 5-12 months lead relationships with SST (Xu et al., 1993; Chen et al, 2010; Wang et al., 2003). Using a cumulative period of SOI, EMWMI 5-8 months ahead as initial values can help improve the final forecast results. Our results in table 2 are consistent with the actual physical ENSO process. Therefore, we selected the retrospective order as  $p=6$ .

Then, the prediction experiments can be carried out, based on improved self-memorization Eq. (3).

The improved self-memorization equation of  $T_1, T_2$ , SOI and EAWMI can then be established. After the differential equation was discretely dealt with, the memory coefficients were solved by the least-squares method given in section 4 (Training period is January 1951 to April 2008). Finally, the improved prediction equation of  $T_1, T_2$ , SOI and EAWMI, based on the self-memorization principle, can be expressed as:

$$\begin{cases} x_{1t} = \sum_{i=-7}^{-1} \alpha_{1i} y_{1i} + \sum_{i=-6}^0 \theta_{1i} F_1(x_{1i}, x_{2i}, x_{3i}, x_{4i}) \\ x_{2t} = \sum_{i=-7}^{-1} \alpha_{2i} y_{2i} + \sum_{i=-6}^0 \theta_{2i} F_2(x_{1i}, x_{2i}, x_{3i}, x_{4i}) \\ x_{3t} = \sum_{i=-7}^{-1} \alpha_{3i} y_{3i} + \sum_{i=-6}^0 \theta_{3i} F_3(x_{1i}, x_{2i}, x_{3i}, x_{4i}) \\ x_{4t} = \sum_{i=-7}^{-1} \alpha_{4i} y_{4i} + \sum_{i=-6}^0 \theta_{4i} F_4(x_{1i}, x_{2i}, x_{3i}, x_{4i}) \end{cases} \quad (7)$$

where



$$\begin{aligned}
509 \quad \alpha &= [\alpha_{ij}] = \begin{bmatrix} 0.0315 & -2.113 & 0.0284 & 2.1468 & 0.0688 & -0.7014 & 1.3248 \\ 0.4088 & -1.887 & -1.0233 & 1.5485 & 0.9028 & 1.0255 & -0.6443 \\ -0.9088 & -0.2557 & 0.9671 & -0.0054 & 1.0568 & 2.9764 & -0.5234 \\ 0.2088 & -1.0567 & 0.4891 & -0.5066 & -0.4890 & 1.4555 & 1.0966 \end{bmatrix} \\
& (i = 0, 1, \dots, 4; j = -7, -6, \dots, -1) \\
510 \quad \theta &= [\theta_{ij}] = \begin{bmatrix} 0.0485 & 0.0425 & -1.7688 & 0.8543 & 2.8901 & -0.1788 & -0.9066 \\ 0.07642 & 0.0941 & -1.2466 & -0.2288 & 0.1097 & 2.3221 & -1.4228 \\ -0.5288 & 1.2368 & -0.5568 & -0.0155 & 0.2886 & -0.1560 & 1.2775 \\ 1.5335 & -0.2887 & -0.5336 & -0.6072 & -0.5611 & 1.0225 & -1.0625 \end{bmatrix} \\
& (i = 0, 1, \dots, 4; j = -6, -5, \dots, 0)
\end{aligned}$$

511 The step-by-step forecast was performed. The retrospective order  $p = 6$  means  
512 that earlier seven observation data ( $p + 1 = 7$ ) should be used during the forecasting  
513 process. The forecast results per month were saved for the next period predictions.

#### 514 5.1.2 Long-term step-by-step forecasts of $T_1$ and $T_2$

515 To test the actual forecast performance of the above improved model, long-term  
516 step-by-step forecasts of  $T_1$  and  $T_2$  from May 2008 to December 2010 for 20 months  
517 were carried out, as shown in Fig. 4. The forecast results of  $T_1$  and  $T_2$  were good.

518 Within 8 months, the ~~correlation coefficients~~CCs of  $T_1$  and  $T_2$  were 0.9163 and  
519 0.9187. MAPEs of  $T_1$  and  $T_2$  were small, only 5.86% and 6.78%. The forecast time  
520 series from 8 months to 14 months gradually diverged, but the trend was acceptable.

521 The ~~CC~~correlation-coefficient of  $T_1$  and  $T_2$  reached 0.8375 and 0.8251, and  
522 MAPEs of  $T_1$  and  $T_2$  were 8.32% and 9.11%. After 14 months, forecast began to

523 diverge and the error started to increase, but the ~~correlation-CC~~coefficients of  $T_1$  and  
524  $T_2$  remained about 0.6899 and 0.6782, and MAPEs reached 18.31% and 19.44%,  
525 which can be acceptable.

#### 526 5.2 Cross-validated retroactive hindcasts of time series $T_1$ and $T_2$

As in section 3, the model's skill should be further assessed by cross-validated retroactive hindcasts of the time series. Because our step-by-step forecasts need the earlier seven observation data ( $p + 1 = 7$ ), we can obtain cross-validated retroactive hindcast results of  $T_1$  and  $T_2$  from August 1951 to December 2010, as shown in Fig. 5.

From Fig. 5, the forecast performance of  $T_1$  and  $T_2$  was good. The [CC correlation coefficient](#) of  $T_1$  and  $T_2$  were 0.7124 and 0.7036, respectively. The MAPEs of  $T_1$  and  $T_2$  were small, only 19.57% and 19.79%, respectively. The peaks and valleys of  $T_1$  and  $T_2$  were also forecasted accurately. The forecast results indicated that the cross-validated retroactive hindcast results of  $T_1$  and  $T_2$  were close to the observed values. Compared to Fig. 3, the improved model had better forecast abilities than the original model.

Many researchers (Zhang et al., 2003b; Smith, 2004) have used Oceanic Niño Index (ONI) which is used by the U.S. NOAA Climate Prediction Center to determine the El Niño and La Niña years. It defined that the ONIs of five consecutive months in winter were all more than 0.5 (less than -0.5) is the El Niño (La Niña) year. Based on the above criterion, we can divide the total 60 years (1951-2010) into three categories. It includes the 18 examples of El Niño year (such as 1958, 1964, 1966, etc.), 22 examples of La Niña year (such as 1951, 1955, 1956, etc.) and the remaining 20 experiments of the neutral year. Since the details in Fig.5 is not clear, we list the forecast results of 60 experiments (including 18 El Niño examples, 22 La Niña examples and 20 Neutral examples) in table 3.

From table 3, the average of  $CC$  of both  $T_1$  and  $T_2$  of 60 experiments within 6 months was more than 0.84 and MAPE was less than 8%. The average of  $CC$  within 12 months was more than 0.74 and MAPE was less than 12%. According to the literature (Barranel et al., 1999), when MAPE was less than 15%, which means the error was not great and the forecast results were good. Obviously, the forecast results of El Niño / La Niña experiments were a little worse than those of neutral examples, which means the forecast ability of our model for the abnormal situation was a little worse than those for the normal situation. But even for El Niño / La Niña experiments, the average of  $CC$  was still more than 0.7 and MAPE was less than 15%, which means the error was not too large and was still within an acceptable range.

### 5.3 Forecast of the SSTA field

When we obtained the forecast results of the time coefficient series  $T_1$  and  $T_2$ , we submitted them into the following equation to reconstruct the forecast SSTA field:

$$\hat{x}_t = \sum_{n=1}^2 E_n \bullet T_{nt}, t = 1, 2, \dots, 12 \quad (8)$$

where  $E_n$ ,  $T_{nt}$  are the EOF space fields and forecast time coefficients, respectively, and  $\hat{x}_{ij}$  is the forecast SSTA field reconstructed by EOF.

After reconstruction of the space mode (treated as constant) and time coefficient series (model prediction), the forecast of the SSTA fields was obtained, based on the forecast results of  $T_1$  and  $T_2$  in Section 5.2. For economy of space, we cannot draw all of the forecasted SSTA fields, so we selected a strong El Niño event (December 1997), a strong La Niña event (December 1999) and a neutral event (November 2002) as examples.

Fig. 6 shows the forecast SSTA field during a strong El Niño event. From the actual SSTA field in December 1997 (Fig. 6a), an obvious warm tongue structure occurred in the area of  $[10^{\circ}\text{S}\sim 5^{\circ}\text{N}, 90^{\circ}\text{W}\sim 150^{\circ}\text{W}]$  in the Eastern Equatorial Pacific, and a warm anomalous distribution arose in the west Pacific, which indicated a weak El Niño event. The forecasted SSTA field of December 1997 is shown in Fig. 6b. Although the range of warm tongue was a little bigger than the actual situation, the forecast shape was similar to the actual field and also the contour lines were similar. The average MAPE between the forecast field and the actual field is 8.56%, which was controlled within 10%. The forecast results of the improved model event were quite good for the El Niño event.

Fig. 7 shows the forecasted SSTA field of a strong La Niña event. From the actual SSTA field in December 1999 (Fig. 7a), an obvious cold pool occurred in the area of  $[10^{\circ}\text{S}\sim 10^{\circ}\text{N}, 120^{\circ}\text{W}\sim 180^{\circ}\text{W}]$  in the Equatorial Pacific, which covered the Niño3.4 area. This SSTA field presented a strong strength La Niña event. The forecast SSTA field from December 1999 is shown as Fig. 7b. Although the strength of the cold pool was weaker than the actual situation, the forecast shape was similar to that of the actual field. The average MAPE between the forecast field and the actual field was 9.69%. The errors were larger than that of the El Niño event, but they can be controlled within 10%, which is acceptable.

Fig. 8 shows the forecasted SSTA field of a neutral event. From the actual SSTA field in November 2002 (Fig. 8a), a warm pool occurred in the area of  $[10^{\circ}\text{S}\sim 10^{\circ}\text{N}, 120^{\circ}\text{W}\sim 180^{\circ}\text{W}]$  in the Equatorial Pacific, which covered the Niño3.4 area. However,

the warm pool was small and weak, which represented a neutral event. The forecasted SSTA field from November 2002 is shown in Fig. 8b. Comparing Figures 6, 7 and 8, we can see that the forecasted SSTA field of a neutral event was a little worse than that of the El Niño and La Niña events. The forecasted shape of the SSTA field basically described the actual situation, but the warm pool in the Niño3.4 area was stronger and bigger than that of the actual situation, which indicated a borderline El Niño event. The average MAPE between the forecasted field and the actual field was 14.50%, which was big but can be accepted.

We obtained the average values of MAPE of 18 El Niño events, 22 La Niña events and 20 neutral events, which were 9.52%, 9.88% and 14.67%, respectively, representing a good SSTA field forecasting ability of our model.

#### 5.4 Forecast of ENSO index

The ENSO index can be represented as the sea surface temperature anomaly (SSTA) in the Niño-3.4 region ( $5^{\circ}\text{N}$ - $5^{\circ}\text{S}$ ,  $120^{\circ}$ - $170^{\circ}\text{W}$ ) and the ENSO index forecast was the 3-month forecast (Barnston et al. 2012). So we also can pick up the ENSO index from the above forecasted SSTA field. The forecast results of the ENSO index within 20 months can also be obtained. The definition of lead time can be seen in the reference (Barnston et al. 2012). Therefore, similar to the forecast experiment in section 5.1, a succession of running 3-month mean SST anomalies with respect to the climatological means for the respective prediction periods, averaged over the Niño 3.4 region, can be obtained, as demonstrated in Fig. 9.

The evaluation criteria of the ENSO index is the temporal correlation (TC), its

definition and specific calculation steps can be seen in these literatures (Kathrin et al.,2016; Nicosia et al. 2013); The TC is often used to measure the prediction effect of the ENSO index. For example, Barnston et al.in 2012 also used the TC to compare the forecast skill of 21 real-time seasonal ENSO models.

The forecast results within lead times of 18 months are shown in Fig. 9, which demonstrate that the forecast results of the ENSO index are good. Within lead time of 12 months, the ~~correlation coefficient~~TC was 0.8985 and the MAPE value was small, only 8.91%. In addition, the borderline La Niña event in 2008–2009 was predicted well. After lead times of 12 months, forecasts began to diverge and the errors started to increase. Although the ~~correlation coefficient~~TC remained approximately 0.61, MAPE reached 18.58%. Therefore, a moderate strength El Niño event that occurred in 2009/10 was not predicted.

We should give more examples to test the ENSO prediction ability of our model. As in section 5.3, we can divide 60 examples as three types, which are examples of ElNiño year, LaNiña year and neutral year. Finally, we can obtain the forecast results of different types of examples in different lead times, as shown in table 4.

From table 4, the average ~~CC~~TC of 60 experiments was 0.712 and the average MAPE was 7.62% within 12 months for all seasons of lead time, which indicates that the overall ENSO forecast ability of our model was good. The forecast results of the El Niño examples were significantly worse than those of La Niña examples, while the forecast results of La Niña examples were significantly worse than those of neutral examples, which show the model forecast ability of the abnormal state was worse than

带格式的：字体：小四

the normal state of the ENSO index. Even for the forecast results of El Niño examples, the average ~~CC-TC~~ was still above 0.6 and the average MAPE can be controlled below 10%, which means the forecast results were still in the acceptable range. Our model not only accurately predicted the stronger El Niño and La Niña phases but also the neutral states. ~~But the forecast results in summer were a little worse than those in winter, as shown in Fig.10.~~

The ENSO forecast often had a spring predictability barrier (Webster, 1999), which was most prominent during decades of relatively poor predictability (Balmaseda et al., 1995). To test our model, the skill should be computed over the entire time series and separately for seasonal subsets of the time series. ~~From the table4, we can see that The average cumulative correlation coefficient and MAPE of winter were compared with those of summer, as shown in Fig.10. The average cumulative correlation and average cumulative MAPE values between the forecast values and the actual values changed with time, from which good trends of forecast results can be seen. As long as the forecast time increased, the cumulative MAPE increased and the correlation decayed gradually. The forecast results appeared to diverge. Although the forecast results of the present model in the summer-spring were worse than in the winter-autumn, the margin was not high, which means the model can overcome the “spring predictability barrier,” to some extent.~~

## 5.5 Compared with six mature models

Barnston et al. (2012) compared many ENSO forecast models. Based on his research, we selected four high quality dynamical models, including ECMWF, JMA,

the National Aeronautics and Space Administration Global Modelling and Assimilation Office (NASAGMAO) and the National Centre for Environmental Prediction Climate Forecast System (NCEP CFS; Version1). Two high quality statistical models also be selected, including the University of California, Los Angeles Theoretical Climate Dynamics (UCLA-TCD) multilevel regression model and the NOAA/NCEP/CPC constructed Analogue (CA) model. The detail of the above models can be seen in these references ([ReynoldsReynolds et al., 2002](#); Luo et al., 2005; Barnston et al., 2012).

We then compared the forecast ability of the above six models with that of our model. All of the experiments of our model and six other models were conducted under the same conditions using the same historical data for modelling and the same initial values to forecast. In the CPC website, there are detailed explanations of six models' training samples and the initial values. So we do not need to install all these models on their own machines and run them for forecasting. We just made training samples and initial values of our model were the same with those of selected six models. At an 8-month lead time, the ~~correlation-ability~~[TC](#) of our model for all seasons combined was 0.613 (Fig. [4-10](#)). In brief, the forecast ability of the ECMWF model was slightly better than that of our model but the ability of the other 5 models was worse than that of our model. While, in regard to the forecast length, the ~~temporal~~[correlation](#)[TC](#) within 12 months of our model is greater than 0.6, which was superior to the ECMWF model. In addition, the forecast results of the UCLA-TCD model and the CPC CA model reduced quickly after 5-month lead times, so the forecast ability of



our model was more stable than them.

The root mean square error (RMSE) was also examined to assess the performance of discrimination and calibration. Barnston et al. (2012) believed that all seasonal RMSE values contributed equally to a seasonally combined RMSE. So we drew figure [12-11](#) to show seasonally combined RMSE.

From Fig. [14-0](#) and Fig. [12-11](#), we can see the highest correlation tend to have lower RMSE. So the RMSE of our model was slightly higher than that of ECMWF model, but it was much lower than those of the other 5 models. [Figure 11 and Figure 12 is the average CETS and RMSE of the 240 experiments of compared with six mature models, covers a variety of different types of ENSO and different lead time. So those samples should be really representative .](#)

## 6. Conclusions and discussion

### 6.1 Conclusions

A new forecasting model of the SSTA field was proposed based on a dynamic system reconstruction idea and the principle of self-memorization. The approach of the present paper consisted of the following steps:

(1) The SST field can be time (coefficients)-space (structure) deconstructed using the EOF method. Take  $T_1$ ,  $T_2$ , SOI and EAWMI and consider them as trajectories of a set of four coupled quadratic differential equations based on the dynamic system reconstruction idea. The parameters of this dynamic model were estimated using a GA.

(2) The forecast results of the dynamic model can be improved by the

带格式的: 缩进: 首行缩进: 2 字符

带格式的: 字体: Times New Roman, 字体颜色: 自动设置, 英语(英国)

带格式的: 字体: Times New Roman, 字体颜色: 自动设置, 英语(英国)

带格式的: 字体: Times New Roman, 字体颜色: 自动设置, 英语(英国)

self-memorization principle. The memory coefficients in the improved self-memorization model were obtained using the GA method.

(3) The long-term step-by-step forecast results and cross-validated retroactive hindcast results of time series  $T_1$  and  $T_2$  are all found to be good, with the correlation coefficient CC of approximately 0.80 and a mean absolute percentage error the MAPE of less than 15%.

(4) The improved model was used to forecast the SSTA field. The forecasted SSTA fields of three types of events are accurate. Not only is the forecast shape similar to the actual field but also the contour lines are similar.

(5) The improved model was also used to forecast the ENSO index. The average correlation coefficient TC of 60 examples within 12 months is 0.712, and the MAPE value is small, only 7.62%, which proves that the improved model has better forecasting results of the ENSO index. Although the forecast results of the model in the summer were worse than in the winter, the margin was not high, which means that the model can overcome the spring predictability barrier to some extent. Finally, compared with the six mature models, the new dynamical-statistical forecasting model has a scientific significance and practical value for the SST in the eastern equatorial Pacific and El Niño/La Niña event predictions.

## 6.2 Discussion

L'Heureux et al.(2013) reported that using different data sets and time periods, the 2nd EOF is not stable, being entirely due to the strong trend. So we need to do more experiments to prove that we choose the second mode of EOF to be appropriate.

带格式的：缩进：首行缩进：3 字符

带格式的：字体：(中文) 宋体，小四，非加粗

and whether different time periods will make us forecast unstable or not. Our original data is the monthly average SST data from January 1951 to Dec. 2010, which are 60 years. We will increase the length of the data for 20 years (Jan.1931 –Dec.2010), for 10 years (Jan.1941- Dec.2010) and decrease the length of the data for 10 years (Jan.1961- Dec.2010), for 20 years (Jan.1971- Dec.2010). And then we use the same method to reconstruct a model and forecast the ENSO index as section5.4. The prediction results are shown in the table5.

From the table, we can see that in the 60 experiments, the prediction results of the data period increased by 20 years are the best, and the prediction results of the data period decreased by 20 years is the worst. This is because the more data we use, the more information it contain. But from the table we can also see the difference among forecast results of both TC and MAPE of five different sample data are less, and no abnormal change suddenly worse or better appear. All these indicate that using different data sets and time periods, even though may have a certain impact on the pattern of the 2nd EOF, but the impact on our forecast is not great and it will not make our forecast unstable.

Actually, how many variables and which variables are used in our model become a key issue to be resolved. We are a complex four factor differential equations coupling model. We are a complex coupled model of four factor differential equations, so we are more concerned with the correlation between each other. The correlation must be considered as an important criterion to select the factors, but in order to further verify the correctness of the selection criterion, we have carried out

带格式的：字体：(中文) 宋体，小四，非加粗

带格式的：字体：(中文) 宋体，小四，非加粗

带格式的：字体：(中文) 宋体，小四，非加粗

带格式的：字体：(中文) 宋体，小四，非加粗

带格式的：字体：(中文) 宋体，小四，非加粗

the prediction experiments (the 60 cross-validated retroactive hindcasts experiments of the ENSO index for all seasons combined at lead times of 8 months ) of different variables.

We can see that for all the forecast results of the models of different variables, the prediction results of  $T_1, T_2, SOI$  is the best among those of the three factors and the prediction result of  $T_1, T_2, SOI, EAWMI$  is the best among those of the four factors. But the prediction result of  $T_1, T_2, SOI, EAWMI$  is best among all, which proves that our selection factors are correct. In our previous study (Hong et al., 2015), the model of the Western Pacific subtropical high was established by using the correlations as a criterion to select factors and their forecast results are also good. Now we use the correlations as a criterion to select factors is also in line with our previous research.

Because the formula of our model includes a linear combination of 4 variables ( $T_1, T_2, SOI, EAWMI$ ), statistical forecasting requires independence between predictors. We can calculate the correlation coefficients between variables, as shown in table 5. In fact, as Table 5 shows, the correlation coefficients between the factors were all less than 0.45, indicating the independence between factors. So this does not generate too much redundancy and can avoid an overfitting problem, which can destroy the stability of the model.

The definition of overfitting: The learned hypothesis may fit the training set very well, but fail to predict to new examples (fail to fit additional data or predict future observations reliably).

The potential for overfitting depends not only on the number of parameters and

带格式的: 字体: Times New Roman, 字体颜色: 自动设置

带格式的: 缩进: 首行缩进: 1.11 厘米, 定义网格后不调整右缩进, 不调整西文与中文之间的空格, 不调整中文和数字之间的空格

带格式的: 字体: Times New Roman, 字体颜色: 自动设置

带格式的 ...

带格式的 ...

带格式的 ...

带格式的 ...

带格式的 ...

带格式的 ...

带格式的: 字体: Times New Roman

带格式的 ...

770 data but also the conformability of the model structure with the data shape, and the  
771 magnitude of model error compared to the expected level of noise or error in the  
772 data(Burnham and Anderson, 2002). So there are many reasons causing the overfitting  
773 phenomenon. But this does not mean having many parameters relative to the number  
774 of observations inevitably causes the overfitting problem (Golbraikh et al., 2003).  
775 There is no evidence that more parameters will be certain to result in overfitting.  
776 Based on the definition of overfitting and the previous studies(Golbraikh et al., 2003;  
777 Everitt and Skrondal,2010), we can judge whether a model is overfitting or not by the  
778 accuracy of prediction results of independent samples (Golbraikh and Tropsha, 2002;  
779 Qin and Li, 2006).

780 In the sample training, our model does not purposely pursue the high degree of  
781 the training samples fitting and improve the effectiveness of the independent  
782 generalization. In fact in our paper the forecast results of the Cross-validated  
783 retroactive hindcasts (section 5.2) and the independent samples validation (table3 and  
784 table4) are both good. Especially, the independent samples validation of the ENSO  
785 index as the table4, we have carried out the 240 independent sample validation  
786 prediction of four seasons of different ENSO events and the coverage of independent  
787 samples test is very wide. Moreover, compared with 6 mature prediction models, the  
788 forecast results of our model are also good, which prove the overfitting problem does  
789 not exist in our model. According to the previous literature (Islam and Sivakumar,  
790 2002; Sivakumar et al.,2001), we can see that prediction principle and structure of the  
791 phase space reconstruction (PSR) of dynamical system is not the same with the

带格式的

带格式的

traditional neural network and in the small sample situation the forecasting results of PSR model are better than those of the traditional neural network (Sivakumar et al., 2002), which can be verified in the independent sample test (table3 and table4). So according to the definition of overfitting, we can say the over fitting phenomenon does not exist in our model.

The introduction of self memorization essentially introduces a lot of new coefficients, which may cause an overfitting problem. Because we have selected a model of four variables, there is a total of 62 parameters. In order to avoid the overfitting problem, the sample sizes are more than 10% of the amount of parameters. So our sample size is greater than 620 data to avoid the overfitting problem. If we choose the model of three variables, the parameters in which will be less, the sample size in this situation can be less. But the forecast results may be a little worse, based on the analysis in section 2.3. So the length of training samples is related to the number of parameters of our model.

Also, we have tried to detrend our data before the model constructed. But we found the results didn't change too much. That is mean our model is not very sensitive to climate change, so the detrended data has little effect for our model to improve the forecast effect.

Compared with the original model, why the improved model has good forecast results and can overcome the spring predictability barrier to some extent are as follow: Recently, many studies have pointed out that spring is the most unstable season of the air - sea interaction and the error is likely to develop or grow in the spring, resulting in

带格式的: 字体: Times New Roman, 字体颜色: 自动设置

the spring predictability barrier (Zhang et al, 2012; Philander et al., 1992). When the original model uses the indexes in summer as the initial values to predict, the SOI factor representing the air-sea interaction is most unstable in the spring and the EMWMI factor does not have much influence on ENSO in summer, so the forecast results using the indexes in summer as the initial values are certainly much worse than those using the indexes in the winter as the initial values. That is why our original model does not overcome the spring predictability barrier.

However, the introduction of the self-memorization dynamics principle can help our model overcome the spring predictability barrier to some extent. Although the lead time is still summer (such as JJA), the information of the initial value actually contains the previous  $p + 1$  month (in this case  $p = 6$ , which contains the information of the previous seven months, including the information of  $T_1, T_2$ , SOI, EMWMI factor in winter (January, February), spring (March, April, May) and summer (June and July)). From the dynamical analysis, in this situation, the information and interaction relationship of four factors have been a long period (from winter to summer) accumulated, containing much air-sea interaction processes and winter monsoon continued abnormal information, so the forecast results of our improved model will be much better than the original model which simply uses only one initial value. That is why the improved model overcomes the spring predictability barrier to some extent.

The forecast results of our model are good, but it still has some problems:

- (1) [The inclusion of these terms and the physical processes do these terms in](#)

equation (2) represent are important, especially for the discussion of dynamical characteristics of the dynamical model. But now we are difficult to give a clear meaning. Now the main work of our paper is the prediction experiments of the model. For the reason of time and length, this paper mainly discusses the prediction results of the model. The physical processes do these terms represent and the discussion of the dynamical characteristics of the model will be the focus of our next work. Before this, we have also used the Takens' delay embedding theorem to reconstruct the dynamical model of the Western Pacific subtropical high(WPSH). And Based on the reconstructed dynamical model, dynamical characteristics of WPSH are analyzed and an aberrance mechanism is developed, in which the external forcings resulting in the WPSH anomalies are explored, which have been published (Hong et al., 2016). We also study the bifurcation and catastrophe of the West Pacific subtropical high ridge index of a nonlinear model (Hong et al., 2017). Based on our previous method and work, our next work is to analyse the physical processes and the dynamical characteristics of the SST field.

~~Although the reason why the improved model has good forecast results has discussed in the section6.2, the deep physical mechanisms that the proposed model has dealt with is not very clear, so its dynamical characteristics should be further analysed.~~

— (2)The experiments in the present study have proven that the forecasting results of the improved model are good for large-scale systems, such as ENSO events, and the forecasting period has been extended. However, for small-scale systems, such as



Hurricanes, whether the forecast results could be improved using the present improved model needs to be further verified.

(3) Our paper focuses primarily on these defined indices with  $T_1, T_2$  to reconstruct a prediction model. Maybe, we can select variables (predictor) based on EOF analysis and our model may be a more physically oriented model. Maybe we can learn from Yim et al. (2013; 2015) to draw correlation maps between these fields and the SSTA field and select the predictors from physical considerations. All these above questions require that a lot of experiments to be carried out.

These items will be our future work.

**Acknowledgments** This study was supported by the Chinese National Natural Science Fund (nos 41375002, 41075045, 41306010, 41571017, 51190091 and 41071018) and the Chinese National Natural Science Fund (BK20161464) of Jiangsu Province, the Program for New Century Excellent Talents in University (NCET-12-0262), the China Doctoral Program of Higher Education (20120091110026), the Qing Lan Project, the Skeleton Young Teachers Program, and the Excellent Disciplines Leaders in Midlife-Youth Program of Nanjing University.

## **APPENDIX A: THE PRINCIPLE OF DYNAMICAL MODEL RECONSTRUCTION**

Suppose that the physical law of a nonlinear system going by over time can be expressed as the following difference form:

$$\frac{q_i^{(j+1)\Delta t} - q_i^{(j-1)\Delta t}}{2\Delta t} = f_i(q_1^{j\Delta t}, q_2^{j\Delta t}, \dots, q_i^{j\Delta t}, \dots, q_N^{j\Delta t}) \quad j = 2, 3, \dots, M-1 \quad (A1)$$

where  $f_i$  is the generalized nonlinear function of  $q_1, q_2, \dots, q_i, \dots, q_N$ ,  $N$  is the number of variables, and  $M$  is the length of observed data.  $f_i(q_1^{j\Delta t}, q_2^{j\Delta t}, \dots, q_i^{j\Delta t}, \dots, q_N^{j\Delta t})$  can be assumed to contain two parts:  $G_{jk}$  representing the expanding items which contain variable  $q_i$ ,  $P_{ik}$  just representing the corresponding parameters which are real numbers ( $i = 1, 2, \dots, N, j = 1, 2, \dots, M, k = 1, 2, \dots, K$ ).

It can be supposed as follows:

$$f_i(q_1, q_2, \dots, q_N) = \sum_{k=1}^K G_{jk} P_{ik} \quad (A2)$$

$D = GP$  is the matrix form of Eq.(A2), in which

$$D = \begin{Bmatrix} d_1 \\ d_2 \\ \dots \\ d_M \end{Bmatrix} = \begin{Bmatrix} \frac{q_i^{3\Delta t} - q_i^{\Delta t}}{2\Delta t} \\ \frac{q_i^{4\Delta t} - q_i^{2\Delta t}}{2\Delta t} \\ \dots \\ \frac{q_i^{M\Delta t} - q_i^{(M-2)\Delta t}}{2\Delta t} \end{Bmatrix}, \quad G = \begin{Bmatrix} G_{11}, G_{12}, \dots, G_{1K} \\ G_{21}, G_{22}, \dots, G_{2,K} \\ \dots \\ G_{M1}, G_{M2}, \dots, G_{M,K} \end{Bmatrix}, \quad P = \begin{Bmatrix} P_{i1} \\ P_{i2} \\ \dots \\ P_{iK} \end{Bmatrix} \quad (A3)$$

Parameters of the above equation can be determined through inverting the observed data. Vector  $P$  which satisfies the above equation can be solved, based on a given vector  $D$ . Assuming  $q$  is unknown, it is a nonlinear system. However, assuming  $P$  is unknown, it is a linear system.

With the restriction  $S = (D - GP)^T (D - GP)$  as a minimum, GA is introduced as an optimization solution search in the model parameters space.

Assuming that the parameters matrix  $P$  is the population (solutions), the  $S = (D - GP)^T (D - GP)$  is an objective function,  $l_i = \frac{1}{S}$  is the value of individual fitness, and  $L = \sum_{i=1}^n l_i$  is the value of total fitness. The operating steps of GA include:

creation and coding of initial population (solutions), fitness calculation, the choice of

male parents, crossover and variation, etc. A detailed theoretical explanation can be got from Wang (2001). The step length is 1 month during the calculation. After optimization searches and genetic operations, the target value can be rapidly converged on and each optimal parameter of the dynamical equations can be obtained.

Through the above approach, we can obtain parameters of a nonlinear dynamical system, and reconstruct the nonlinear dynamical equations from observed data.

## APPENDIX B: THE MATHEMATICAL PRINCIPLE OF SELF-MEMORIZATION DYNAMICS OF SYSTEMS

The dynamical equations of a system can be expressed as:

$$\frac{\partial x_i}{\partial t} = F_i(x, \lambda, t) \quad i = 1, 2, \dots, J \quad (\text{B1})$$

where  $J$  is an integer,  $x_i$  is the  $i$ th variable of the system state, and  $\lambda$  is the parameter. Equation (B1) represents the relationship between a source function  $F$  and a local change of  $x$ . Obviously,  $x$  is a scalar function with time  $t$  and space  $r_0$ . A set of time  $T = [t_{-p} \dots t_0 \dots t_q]$  can be considered, where  $t_0$  is an initial time. A set of space  $R = [r_a \dots r_i \dots r_\beta]$  can be considered, where  $r_i$  is a spatial point.

An inner product in space  $L^2 : T \times R$  is defined by:

$$(f, g) = \int_a^b f(\xi) g(\xi) d\xi, \quad f, g \in L^2 \quad (\text{B2})$$

Accordingly, a norm can be defined as:

$$\|f\| = \left[ \int_a^b (f(\xi))^2 d\xi \right]^{1/2}$$

921 For a completion  $L^2$ , it can become a Hilbert space  $H$ . A generalized one  
 922 in  $H$  can be regarded as a solution of the multi-time model. By introducing a  
 923 memorization function  $\beta(r, t)$ , we can obtain:

$$924 \quad \int_{t_0}^t \beta(\tau) \frac{\partial x}{\partial \tau} d\tau = \int_{t_0}^t \beta(\tau) F(x, \tau) d\tau \quad (B3)$$

925 where  $r$  in  $\beta(r, t)$  can be dropped through fixing on the spatial point  $r_0$ . Suppose  
 926 that function  $\beta(r, t)$  and variable  $x$  etc. are all continuous, differentiable and  
 927 integrable, an integration by the left parts of Eq. (B3) can be made as:

$$928 \quad \int_{t_0}^t \beta(\tau) \frac{\partial x}{\partial \tau} d\tau = \beta(t)x(t) - \beta(t_0)x(t_0) - \int_{t_0}^t x(\tau)\beta'(\tau)d\tau \quad (B4)$$

929 where  $\beta'(t) = \partial\beta(t)/\partial t$ . The mean value theorem can be introduced into the third  
 930 term in Eq. (B4), the following equation can be obtained:

$$931 \quad -\int_{t_0}^t x(\tau)\beta'(\tau)d\tau = -x^m(t_0)[\beta(t) - \beta(t_0)] \quad (B5)$$

932 where  $x^m(t_0) \equiv x(t_m)$ ,  $t_0 < t_m < t$ . Substituting Eq. (B4) and Eq. (B5) in Eq. (B3) and  
 933 carrying out an algebraic operation, the following equation can be obtained:

$$934 \quad x(t) = \frac{\beta(t_0)}{\beta(t)} x(t_0) + \frac{\beta(t) - \beta(t_0)}{\beta(t)} x^m(t_0) + \frac{1}{\beta(t)} \int_{t_0}^t \beta(\tau) F(x, \tau) d\tau \quad (B6)$$

935 Because the  $x$  value which is at initial time  $t_0$  and middle time  $t_m$ , only on  
 936 the fixed point  $r_0$  itself, relates to the first term and the second term in Eq. (B6),  
 937 they are called as a self-memory term. Also, we can call the third term as an  
 938 exogenous effect, i.e., which is contributed by other spatial points.

939 Similarly as Eq. (B4), for multi-time  $t_i$ ,  $i = -p, -p+1, \dots, t_0, t$ , it gives

$$\int_{t_{-p}}^{t_{-p+1}} \beta(\tau) \frac{\partial x}{\partial \tau} d\tau + \int_{t_{-p+1}}^{t_{-p+2}} \beta(\tau) \frac{\partial x}{\partial \tau} d\tau + \dots + \int_{t_0}^t \beta(\tau) \frac{\partial x}{\partial \tau} d\tau = \int_{t_{-p}}^t \beta(\tau) F(x, \tau) d\tau .$$

After the same term  $\beta(t_i)x(t_i), i = -p+1, -p+2, \dots, 0$  was eliminated, we

have

$$\beta(t)x(t) - \beta(t_{-p})x(t_{-p}) - \sum_{i=-p}^0 [\beta(t_{i+1}) - \beta(t_i)]x^m(t_i) - \int_{t_{-p}}^t \beta(\tau)F(x, \tau)d\tau = 0 \quad (B7)$$

As a matter of convenience, we set  $\beta_t \equiv \beta(t), \beta_0 \equiv \beta(t_0), x_t \equiv x(t), x_0 \equiv x(t_0)$ ; the

following text uses similar notations. Then, Eq. (B7) can be expressed as:

$$\beta_t x_t - \beta_{-p} x_{-p} - \sum_{i=-p}^0 x_i^m (\beta_{i+1} - \beta_i) - \int_{t_{-p}}^t \beta(\tau)F(x, \tau)d\tau = 0 \quad (B8)$$

Setting  $x_{-p} \equiv x_{-p-1}^m, \beta_{-p-1} = 0$ , the Eq. (B8) can be written as:

$$x_t = \frac{1}{\beta_t} \sum_{i=-p-1}^0 x_i^m (\beta_{i+1} - \beta_i) + \frac{1}{\beta_t} \int_{t_{-p}}^t \beta(\tau)F(x, \tau)d\tau = S_1 + S_2 \quad (B9)$$

$S_1$  is called as a self-memory term and  $S_2$  is called as an exogenous effect term.

For the convenience of calculations, the above self-memorization equation can

be discretized. The differential by difference and the summation can replace the

integration in Eq. (B9), and the mean of two values which are at adjoining times; i.e.,

$$x_i^m \approx \frac{1}{2}(x_{i+1} + x_i) \equiv y_i \text{ can simply replace } x_i^m .$$

Taking an equal time interval  $\Delta t_i = t_{i+1} - t_i = 1$  and incorporating  $\beta_i$  and  $\beta_t$ ,

we can obtain a discretized self-memorization equation as follows:

$$x_t = \sum_{i=-p-1}^{-1} \alpha_i y_i + \sum_{i=-p}^0 \theta_i F(x, i) \quad (B10)$$

where  $F$  is the dynamic kernel of the self-memorization equation,  $\alpha_i = \frac{(\beta_{i+1} - \beta_i)}{\beta_t}$ ;

$$\theta_i = \frac{\beta_i}{\beta_t} .$$

Based on Eq. (B10), the above technique performed computations and the forecast can be called as a self-memorization principle.

## REFERENCES

- Ashok K, Guan Z, Yamagata T : Impact of the Indian Ocean Dipole on the decadal relationship between the Indian monsoon rainfall and ENSO, *Geophys Res Lett*, 28( 23), 4499-4502, 2001.
- Balmaseda M.A., Davey M.K. and Anderson D.L.T.: Decadal and seasonal dependence of ENSO prediction skill, *J Clim.*, 8, 2705–2715, 1995.
- Barnston A. G., et al.: Skill of real-time seasonal ENSO model predictions during 2002-2011, *Bull. Amer. Meteor. Soc.*, 93, 631-651, 2012.
- Belkin M. and P. Niyogi: Laplacian eigenmaps for dimensionality reduction and data representation, *Neural Comput.*, 15, 1373-1391, 2003.
- Bjerknes J.: Atmospheric teleconnections from the equatorial Pacific, *Mon. Wea. Rev.*, 97, 163-172, 1969.
- Burnham, K. P.; Anderson, D. R: *Model Selection and Multimodel Inference* (2nd ed.), Springer-Verlag, 2002.
- Cao H. X.: Self-memorization Equation in Atmospheric Motion, *Science in China (Series B)*, 36(7), 845-855, 1993.
- Chen D., S. E. Zebiak, A. J. Busalacchi and M. A. Cane: An Improved Procedure for El Niño Forecasting: Implications for Predictability, *Science*, 269, 1699-1702, 1995.
- Chen G., Shao B. M. Han Y., et al.: Modality of semiannual to multidecadal oscillations in global sea surface temperature variability. *Journal of Geophysical Research*, 115, 1-14, 2010.
- Chen X. D., Xia J., Xu Q.: Differential Hydrological Grey Model(DHGM) with self-memory function and its application to flood forecasting, *Sci China Tech Sci.*, 52, 1039–1049, 2009.
- Clarke A. J. and S. Van Gorder: Improving El Niño prediction using a space-time integration of Indo-Pacific winds and equatorial Pacific upper ocean heat content, *Geophys. Res. Lett.*, 30, 1399, doi:10.1029/2002GL016673, 2003.
- Delecluse P., Davey M., Kitamura Y., Philander S., Suarez M., Bengtsson L.: TOGA review paper: coupled general circulation modeling of the tropical Pacific, *J Geophys Res*, 103, 14357–14373, 1998.

带格式的: 字体颜色: 自动设置

[Davey M., Huddleston M., Sperber K.R., et al.: A study of coupled model climatology and variability in tropical ocean regions, Clim. Dyn., 18, 403–420, 2002.](#)  
[Dommenges and Latif: A Cautionary Note on the Interpretation of EOFs, Journal of Climate, 15\(2\), 216–225, 2002.](#)  
[Drosowsky W.: Statistical prediction of ENSO \(Niño 3\) using sub-surface temperature data, Geophys. Res. Lett., 33, L03710. doi:10.1029/2005GL024866, 2006.](#)  
[Everitt B.S., Skrondal A.: Cambridge Dictionary of Statistics, Cambridge University Press, 2010.](#)  
[Feng G. L., Cao H. X., Gao X. Q., et al.: Prediction of precipitation during summer monsoon with self-memorial model, Adv Atmos Sci., 18, 701–709, 2001.](#)  
[Fraedrich K.: Estimating weather and climate predictability on attractors, J. Atmos. Sci., 44, 722–728, 1987.](#)  
[Glantz M.H., Katz R.W., Nicholls N \(eds\): Teleconnections linking worldwide climate anomalies, 74pp, Cambridge University Press, Cambridge, UK, 1991.](#)  
[Golbraikh A. and Tropsha A.: Beware of q<sup>2</sup>! Journal of Molecular Graphics and Modelling, 20, 269–276, 2002.](#)  
[Golbraikh A., Shen M., Xiao Z. Y., Xiao Y. D., Lee Kuo-Hsiung, Tropsha A.: Rational selection of training and test sets for the development of validated QSAR models. Journal of Computer-Aided Molecular Design, 17\(2\), 241–253, 2003.](#)  
[Gu X. Q.: A spectral model based on atmospheric self memorization principle, Chinese Science Bulletin, 43\(20\), 1692–1702, 1998.](#)  
[Hong M., Zhang R., Wu G. X., et al.: A Nonlinear Dynamic System Reconstruction of the Subtropical High Characteristic Index based on Genetic Algorithm. Chinese Journal of Atmospheric Sciences, 31\(2\):346–352, 2007.](#)  
[Hong M., Zhang R. and Ma C. C. et al.: A Non-Linear Dynamical–Statistical Model for Reconstruction of the Air–Sea Element Fields in the Tropical Pacific Ocean, Atmosphere–Ocean, doi: 10.1080/07055900.2014.908765, 2014.](#)  
[Hong M., Zhang R., et al.: Reconstruction and forecast experiments of a statistical-dynamical model of the Western Pacific subtropical high and Eastern Asian summer monsoon factors, Weather and Forecasting, 30:206–216, 2015.](#)  
[Hong M., Zhang R., et al.: Catastrophe and Mechanism Analyses of Multiple Equilibria in the Western](#)

带格式的: 字体颜色: 自动设置

[Pacific Subtropical High System Based on Objective Fitting of Spatial Basis Functions. Monthly Weather Review, 144, 997-1015, 2016.](#)

[Hong M., Zhang R., et al.: Bifurcations and catastrophes in a nonlinear dynamical model of the western Pacific subtropical high ridge line index and its evolution mechanism, Theor. Appl. Climatol., 129, 363-384, 2017.](#)

[Hu, T.S., K.C. Lam, and S.T. Ng: River flow time series prediction with a range-dependent neural network, Hydrol. Sci. J., 46, 729–745, 2001.](#)

[Hu Y. J., Zhong Z., Zhu Y. M. et al.: A statistical forecast model using the time-scale decomposition technique to predict rainfall during flood period over the middle and lower reaches of the Yangtze River Valley. Theoretical and Applied Climatology, doi: 10.1007/s00704-017-2094-9, 2017.](#)

[Huang, J., Y. Yi, S. Wang, et al.: An analogue-dynamical long-range numerical weather prediction system incorporating historical evolution, Quart J Roy Meteor Soc, 119\(511\), 547-565, 1993.](#)

[Islam M.N. Sivakumar B.: Characterization and prediction of runoff dynamics: a nonlinear dynamical view. Advances in Water Resources, 25, 179-190, 2002.](#)

[James A. Carton and Benjamin S. Giese: A Reanalysis of Ocean Climate Using Simple Ocean Data Assimilation \(SODA\), Monthly Weather Review, 136\(8\), 2999-3011, 2008.](#)

[Jin E. K., James L. K., Wang B., et al.: Current status of ENSO prediction skill in coupled ocean-atmosphere models, Climate Dyn, 31, 647-664, 2008.](#)

[Johnson S.D., Battistis D.S. and Sarachik E. S.: Empirically Derived Markov Models and Prediction of Tropical Pacific Sea Surface Temperature Anomalies, Journal of Climate, 13, 3-17, 2000.](#)

[Kalnay E., Kanamitsu M. and Kistler R.: The NCEP/NCAR 40-year reanalysis project, Bull. Amer. Meteor. Soc., 77, 437-470, 1996.](#)

[Kathrin Böttner, Jennifer Salau, and Joachim Krieter: Temporal correlation coefficient for directed networks. Springerplus, 5\(1\): 1198-1203, 2016.](#)

[Kim Ji-Won, Soon-Il An, Sang-Yoon Jun, Hey-Jin Park, Sang-Wook Yeh.: ENSO and East Asian winter monsoon relationship modulation associated with the anomalous northwest Pacific anticyclone, Climate Dynamics, 49\(4\), 1157–1179, 2017.](#)

[L'Heureux Michelle L., Collins Dan C., Hu Zeng-Zhen. Linear trends in sea surface temperature of the tropical Pacific Ocean and implications for the El Niño-Southern Oscillation, Climate Dynamics, 40, 1223–1236, 2013.](#)

[Liebmann B. and C.A. Smith: Description of a Complete \(Interpolated\) Outgoing Longwave Radiation](#)



1049 [Dataset, Bulletin of the American Meteorological Society, 77, 1275-1277, 1996.](#)

1050 [Luo, J.-J., S. Masson, S. Behera, S. Shingu, and T. Yamagata: Seasonal climate predictability in a](#)

1051 [coupled OAGCM using a different approach for ensemble forecasts, J. Climate, 18, 4474-4497, 2005.](#)

1052 [Mehchoo C.R., Robertson A.W., Barth N., et al.: The seasonal cycle over the tropical Pacific in coupled](#)

1053 [atmosphere-ocean general circulation models, Mon Weather Rev, 123, 2825-2838, 1995.](#)

1054 [Molteni F., et al.: ECMWF seasonal forecast system 3, CLIVAR Exch, 43, 7-9, 2007.](#)

1055 [Moore A. M., Zavala-Garay J. and Tang Y., et al.: Optimal forcing patterns for coupled models of](#)

1056 [ENSO, J Climate, 19, 4683-4699, 2006.](#)

1057 [Neelin J.D., Latif M. and Allaart M.A.F.: Tropical air-sea interaction in general circulation](#)

1058 [models, Clim Dyn., 7, 73-104, 1992.](#)

1059 [Nicosia V, Tang J, Mascolo C, Musolesi M, Russo G, Latora V: Graph metrics for temporal networks.](#)

1060 [In: Holme P, Saramäki J, editors. Temporal networks. Berlin: Springer, pp. 15-40, 2013.](#)

1061 [Palmer T. N., Alessandri A. and Andersen U., et al.: Development of a European multi-model](#)

1062 [ensemble system for seasonal to interannual prediction \(DEMETER\), Bull Amer Met Soc., 85, 853-872,](#)

1063 [2004.](#)

1064 [Philander S.G., Pacanowski R.C., N-C Lau et al.: Simulation of ENSO with a global atmospheric GCM](#)

1065 [coupled to a high resolution, tropical Pacific Ocean GCM. J. Climate, 5, 308-329, 1992.](#)

1066 [Qin G. H. and Li Z. H.: Over-fitting of BP NN research and its application, Engineering Journal of](#)

1067 [Wuhan University, 39\(6\), 1671-1679, 2006.](#)

1068 [Rasmusson E.M. and Carpenter T.H.: Variations in tropical seasurface temperature and surface wind](#)

1069 [fields associated with the Southern Oscillation/El Niño, Mon Weather Rev., 10, 354-384, 1982.](#)

1070 [Rayner N.A., Parker D.E., Horton E.B., Folland C.K., Alexander L.V., Rowell D.P., Kent E.C., Kaplan A:](#)

1071 [Global analyses of sea surface temperature, sea ice, and night marine air temperature since the late](#)

1072 [nineteenth century. J Geophys Res 108\(D14\):4407. doi:10.1029/2002JD002670, 2003.](#)

1073 [Reynolds, R. W., N. A. Rayner, T. M. Smith, D. C. Stokes, and W. Wang: An improved in situ and](#)

1074 [satellite SST analysis for climate, J. Climate, 15, 1609-1625, 2002.](#)

1075 [Saha S., Nadiga C. and Thiaw J., et al.: The NCEP climate forecast system, Journal of](#)

1076 [Climate, 19, 3483-3517, 2006.](#)

1077 [Saji N. H., Goswami B. N., V. inayachandran P. N., et al.: A dipole mode in the tropical Indian](#)

带格式的: 字体颜色: 自动设置

带格式的: 字体颜色: 自动设置

[Ocean,Nature, 401\( 6751 \),360-363, 1999.](#)

[Smith T.M.: Improved extended reconstruction of SST\(1854-1997\). J. Climate, 17, 2466-2477, 2004.](#)

[Takens, F.: Detecting strange attractors in fluid turbulence,Lecture Notes in Mathematics,898\(2\),361-381 , 1981.](#)

[Sivakumar B, Berndtsson R, Persson M.: Monthly Runoff Prediction Using Phase -space Reconstruction. Hydrological Sciences Journal, 46\(3\), 377 -388, 2001.](#)

[Sivakumar B., Jayawardena A.W., Fernando T.M.K.G.: River flow forecasting: use of phase-space reconstruction and artificial neural networks approaches. Journal of Hydrology, 265, 225-245, 2002.](#)

[Timmermann A., Voss H. U. and Pasmanter R.: Empirical Dynamical System Modeling of ENSO Using Nonlinear Inverse Techniques, Journal of Physical Oceanography, 31,1579-1598 , 2001.](#)

[Tomita, T., and T. Yasunari: Role of the northeast winter monsoon on the biennial oscillation of the ENSO/monsoon system,J. Meteor. Soc. Japan, 74,399–413 , 1996.](#)

[Trenberth, E. K., et al.: Progress during TOGA in understanding and modeling global teleconnections associated with tropical sea surface temperatures,J. Geophys. Res., 107, C7, 14291-14324,1998.](#)

[Wang B., Wu R., Lukas R.: Roles of western North Pacific wind variation in thermocline adjustment and ENSO phase transition,J Meteor Soc Japan,77,1-16,1999a.](#)

[Wang B., Wu R., Li T.: Atmosphere-warm ocean interaction and its impacts on Asian-Australian monsoon variation. J. Climate, 16, 1195-1211, 2003.](#)

[Wang B., Lee J. Y., Shukla J., et al.: Advance and prospectus of seasonal prediction: assessment of the APCC / CliPAS 14-Model Ensemble Retrospective Seasonal Prediction\(1980—2004\),Climate Dyn.,33\(1\),93-117 , 2009a.](#)

[Wang C., Weisberg R. H. and Virmani J. I.: Western Pacific interannual variability associated with the El Niño-Southern Oscillation,J Geophy Res.,104,5131-5149, 1999b.](#)

[Wang, L., W. Chen, and R. H. Huang: Interdecadal modulation of PDO on the impact of ENSO on the east Asian winter monsoon, Geophys. Res. Lett., 35, L20702, doi:10.1029/2008GL035287, 2008.](#)

[Wang, W. C., K. W. Chau, C. T. Cheng, and L. Qiu: A comparison of performance of several artificial intelligence methods for forecasting monthly discharge time series. J. Hydrol., 374, 294–306, doi:10.1016/j.jhydrol.2009.06.019,2009b.](#)

[Wang L.: Intelligent Optimization Algorithms and Its Application, pp. 23-24, Tsinghua University Press, Chendu, 2001.](#)

1108 [Webster P. J., Moore A. M., Loschnigg J. P., et al.: Coupled ocean-atmosphere dynamics in the Indian](#)  
1109 [Ocean during 1997- 98, Nature, 401\( 6751 \),356-360, 1999.](#)

1110 [Weinberger K. Q. and L. Saul: Unsupervised learning of image manifolds by semidefinite](#)  
1111 [programming,Int. J. Comput. Vision.,70, 77-90, 2006.](#)

1112 [Xu B.C., Wang Z.S., Wu J.P. and Zhou E.M.: Interaction between sea surface temperature \(SST\) of](#)  
1113 [information regions and southern oscillation index \(SOI\) in Tropical Pacific Ocean. \*Marine Science\*](#)  
1114 [Bulletin, 12\(5\),211-25,1993.](#)

1115 [Yang, S., K. M. Lau, and K. M. Kim: Variations of the East Asian jet stream and](#)  
1116 [Asian-Pacific-American winter climate anomalies, J. Climate, 15,306–325 , 2002.](#)

1117 [Yang Se-Hwan and Lu Riyu: Predictability of the East Asian winter monsoon indices by the coupled](#)  
1118 [models of ENSEMBLES, Advances in Atmospheric Sciences, 31\(6\), 1279–1292, 2014](#)

1119 [Yim SY, Wang B, Kwon M: Interdecadal change of the controlling mechanisms for East Asian early](#)  
1120 [summer rainfall variation around the mid-1990s.ClimDyn., 42,1325–1333, 2013.](#)

1121 [Yim, S.-Y., B. Wang, W. Xing, M.-M.Lu: Prediction of Meiyu rainfall in Taiwan by multi-lead](#)  
1122 [physicalempiricalmodels.Clim. Dyn., 44 \(11-12\), 3033-3042, doi:10.1007/s00382-014-2340-0, 2015.](#)

1123 [Yoon, J., and S. W. Yeh: Influence of the Pacific Decadal Oscillation on the relationship between El](#)  
1124 [Niño and the northeast Asian summer monsoon, J. Climate,23, 4525–4537, 2010.](#)

1125 [Yu H., J. Huang, and J. Chou: Improvement of Medium-Range Forecasts Using the](#)  
1126 [Analogue-Dynamical Method,Mon. Wea. Rev., 142, 1570–1587, doi:](#)  
1127 [http://dx.doi.org/10.1175/MWR-D-13-00250.1, 2014a.](#)

1128 [Yu H., J. Huang, W. Li, and G. Feng: Development of the analogue-dynamical method for error](#)  
1129 [correction of numerical forecasts,J. Meteor. Res., 28\(5\), 934–947, doi: 10.1007/s13351-014-4077-4 ,](#)  
1130 [2014b.](#)

1131 [Zhang R. and Hong M., et al.: Non-linear Dynamic Model Retrieval of Subtropical High Based on](#)  
1132 [Empirical Orthogonal Function and Genetic Algorithm,Applied Mathematics and](#)  
1133 [Mechanics,27\(12\),1645-1654, 2006.](#)

1134 [Zhang R. and Hong M.,et al.: Retrieval of the non-linear dynamic forecast model of El Nino/La Nina](#)  
1135 [index based on the genetic algorithm optimization. Chinese Journal of Geophysics,51\(5\),1354-1362,](#)  
1136 [2008.](#)

1137 [Zhang R. H., Zhou G. Q. and Chao J. P.: ENSO Dynamics and Its Prediction,Chinese Journal of](#)

[Atmospheric Sciences,27\(4\) ,674-688, 2003a.](#)

[Zhang, R.H., S. E. Zebiak, R. Kleeman, and N.Keenlyside: A new intermediate coupled model for El Niño simulation and prediction. Geophys. Res.Lett., 30, doi:10.1029/2003GL018010, 2003b.](#)

[Zhang, R. H., A. Sumi, and M. Kimoto: Impact of El Niño on the East Asian monsoon: A diagnostic study of the '86/87 and '91/92 events,J. Meteor. Soc. Japan, 74, 49–62, 1996.](#)

[Zhang Y. L., Yu Y. Q., Duan W. S.: The spring prediction barrier of ENSO in retrospective prediction experiments as shown by the four coupled ocean-atmosphere models. Acta Meteorologica Sinica, 70\(3\), 506-519, 2012.](#)

[Zhao J. H., Liu X. Y. and Jiang H. Y., et al.: Characteristics of Sea Surface Height in Tropical Pacific and its relationship with ENSO events,Meteorological and Environmental Sciences, 35\(2\),33-39, 2012.](#)

[Zhou, L.-T., and R. G. Wu: Respective impacts of the East Asian winter monsoon and ENSO on winter rainfall in China,J. Geophys. Res.,115, doi: 10.1029/2009JD012502, 2010.](#)

## REFERENCES

~~Ashok K, Guan Z, Yamagata T : Impact of the Indian Ocean Dipole on the decadal relationship between the Indian monsoon rainfall and ENSO, Geophys Res Lett,28( 23), 4499-4502, 2001.~~

~~Balmaseda M.A., Davey M.K. and Anderson D.L.T.: Decadal and seasonal dependence of ENSO prediction skill,J Clim.,8, 2705-2715, 1995.~~

~~Barber R.T. and Chavez F.P.: Biological consequences of El Niño,Science,222,1203-1210, 1983.~~

~~Barnston A. G., et al.: Skill of real-time seasonal ENSO model predictions during 2002-2011,Bull. Amer. Meteor. Soc.,93, 631-651, 2012.~~

~~Belkin M. and P. Niyogi: Laplacian eigenmaps for dimensionality reduction and data representation,Neural Comput.,15,1373-1391, 2003.~~

~~Bjerknes J.: Atmospheric teleconnections from the equatorial Pacific,Mon. Wea. Rev.,97,163-172, 1969.~~

~~Cao H. X.: Self-memorization Equation in Atmospheric Motion,Science in China (Series B),36(7), 845-855, 1993.~~

~~Chen D., S. E. Zebiak, A. J. Busalacchi and M. A. Cane: An Improved Procedure for El Niño Forecasting: Implications for Predictability,Science, 269, 1699-1702, 1995.~~

~~Chen X. D., Xia J., Xu Q.: Differential Hydrological Grey Model(DHGM) with self-memory function and its application to flood forecasting,Sci China Tech Sci.,52,1039-1049, 2009.~~

带格式的: 字体颜色: 自动设置

Chou J.: The problem of utilizing past data in numerical weather forecasting, *Sci. China*, 6, 635-644, 1974 (in Chinese).

Clarke A. J. and S. Van Gorder: Improving El Niño prediction using a space-time integration of Indo-Pacific winds and equatorial Pacific upper-ocean heat content, *Geophys. Res. Lett.*, 30, 1399, doi:10.1029/2002GL016673, 2003.

Delecluse P., Davey M., Kitamura Y., Philander S., Suarez M., Bengtsson L.: TOGA review paper: coupled general circulation modeling of the tropical Pacific, *J. Geophys. Res.*, 103, 14357-14373, 1998.

Davey M., Huddleston M., Sperber K.R., et al.: A study of coupled model climatology and variability in tropical ocean regions, *Clim. Dyn.*, 18, 403-420, 2002.

Dommenget and Latif: A Cautionary Note on the Interpretation of EOFs, *Journal of Climate*, 15(2), 216-225, 2002.

Drosowsky W.: Statistical prediction of ENSO (Niño-3) using sub-surface temperature data, *Geophys. Res. Lett.*, 33, L03710, doi:10.1029/2005GL024866, 2006.

Feng G. L., Cao H. X., Gao X. Q., et al.: Prediction of precipitation during summer monsoon with self-memorial model, *Adv. Atmos. Sci.*, 18, 701-709, 2001.

Friedrich K.: Estimating weather and climate predictability on attractors, *J. Atmos. Sci.*, 44, 722-728, 1987.

Glantz M.H., Katz R.W., Nicholls N. (eds): *Teleconnections linking worldwide climate anomalies*, 74pp, Cambridge University Press, Cambridge, UK, 1991.

Gu X. Q.: A spectral model based on atmospheric self-memorization principle, *Chinese Science Bulletin*, 43(20), 1692-1702, 1998.

Hong M., Zhang R. and Ma C. C. et al.: A Non-Linear Dynamical-Statistical Model for Reconstruction of the Air-Sea Element Fields in the Tropical Pacific Ocean, *Atmosphere-Ocean*, doi:10.1080/07055900.2014.908765, 2014.

Hu, T.S., K.C. Lam, and S.T. Ng: River flow time-series prediction with a range-dependent neural network, *Hydrol. Sci. J.*, 46, 729-745, 2001.

Huang J., Y. Yi, S. Wang, et al.: An analogue dynamical long-range numerical weather prediction system incorporating historical evolution, *Quart. J. Roy. Meteor. Soc.*, 119(511), 547-565, 1993.

Huang J. P. and Yi Y. H.: A Non-linear Dynamic System Reconstructing of Actual data, *Science in China*, 3(3), 331-336, 1991.

James A. Carton and Benjamin S. Giese: A Reanalysis of Ocean Climate Using Simple Ocean Data Assimilation (SODA), *Monthly Weather Review*, 136(8), 2999–3011, 2008.

Jin E. K., James L. K., Wang B., et al.: Current status of ENSO prediction skill in coupled ocean-atmosphere models, *Climate Dyn*, 31, 647–664, 2008.

Johnson S.D., Battisti D.S. and Sarachik E. S.: Empirically Derived Markov Models and Prediction of Tropical Pacific Sea Surface Temperature Anomalies, *Journal of Climate*, 13, 3–17, 2000.

Kalnay E., Kanamitsu M. and Kistler R.: The NCEP/NCAR 40 year reanalysis project, *Bull. Amer. Meteor. Soc.*, 77, 437–470, 1996.

Liao D., Zhou Y.H. and Liao X.H.: Modulation of the SSTA Decadal Variation on ENSO Events and Relationships of SSTA with LOD, SOI, etc., *Acta Astronomica Sinica*, 48(1), 36–47, 2007.

Liebmann B. and C.A. Smith: Description of a Complete (Interpolated) Outgoing Longwave Radiation Dataset, *Bulletin of the American Meteorological Society*, 77, 1275–1277, 1996.

Li L. P., Wang P. X., He J. H. and Wang D. X.: Analysis of interdecadal and interannual Characteristics of the Tropical western Pacific Warm Pool heat status, *Journal of Tropical Meteorology*, 20(5), 472–482, 2004.

Luo, J.J., S. Masson, S. Behera, S. Shingu, and T. Yamagata: Seasonal climate predictability in a coupled OAGCM using a different approach for ensemble forecasts, *J. Climate*, 18, 4474–4497, 2005.

Mechoso C.R., Robertson A.W., Barth N., et al.: The seasonal cycle over the tropical Pacific in coupled atmosphere-ocean general circulation models, *Mon Weather Rev*, 123, 2825–2838, 1995.

Molteni F., et al.: ECMWF seasonal forecast system 3, *CLIVAR Exch*, 43, 7–9, 2007.

Moore A. M., Zavala Garay J. and Tang Y., et al.: Optimal forcing patterns for coupled models of ENSO, *J Climate*, 19, 4683–4699, 2006.

Neelin J.D., Latif M. and Allaart M.A.F.: Tropical air-sea interaction in general circulation models, *Clim Dyn*, 7, 73–104, 1992.

Palmer T. N., Alessandri A. and Andersen U., et al.: Development of a European multi-model ensemble system for seasonal to interannual prediction (DEMETER), *Bull Amer Met Soc.*, 85, 853–872, 2004.

Panofsky H.A., Brier G.W.: Some applications of statistics to meteorology, Pennsylvania State University Press, Pennsylvania, 1968.

Rasmusson E.M. and Carpenter T.H.: Variations in tropical sea surface temperature and surface wind

fields associated with the Southern Oscillation/El Niño, *Mon Weather Rev.*, 10, 354–384, 1982.

Reynolds, R. W., N. A. Rayner, T. M. Smith, D. C. Stokes, and W. Wang: An improved in-situ and satellite SST analysis for climate, *J. Climate*, 15, 1609–1625, 2002.

Saha S., Nadiga C. and Thiaw J., et al.: The NCEP climate forecast system, *Journal of Climate*, 19, 3483–3517, 2006.

Saji N. H., Goswami B. N., Vinayachandran P. N., et al.: A dipole mode in the tropical Indian Ocean, *Nature*, 401(6751), 360–363, 1999.

Takens, F.: Detecting strange attractors in fluid turbulence, *Lecture Notes in Mathematics*, 898(2), 361–381, 1981.

Tetko, I. V., Livingstone, D. J., Luik, A. I.: Neural network studies. 1. Comparison of Overfitting and Overtraining, *J. Chem. Inf. Comput. Sci.*, 35 (5), 826–833, 1995.

Timmermann A., Voss H. U. and Pasmanter R.: Empirical Dynamical System Modeling of ENSO Using Nonlinear Inverse Techniques, *Journal of Physical Oceanography*, 31, 1579–1598, 2001.

Tomita, T., and T. Yasunari: Role of the northeast winter monsoon on the biennial oscillation of the ENSO/monsoon system, *J. Meteor. Soc. Japan*, 74, 399–413, 1996.

Trenberth, E. K., et al.: Progress during TOGA in understanding and modeling global teleconnections associated with tropical sea surface temperatures, *J. Geophys. Res.*, 107, C7, 14291–14324, 1998.

Wang B., Wu R., Lukas R.: Roles of western North Pacific wind variation in thermocline adjustment and ENSO phase transition, *J. Meteor. Soc. Japan*, 77, 1–16, 1999a.

Wang B., Lee J. Y., Shukla J., et al.: Advance and prospectus of seasonal prediction: assessment of the APCC / CLIPAS 14 Model Ensemble Retrospective Seasonal Prediction (1980–2004), *Climate Dyn.*, 33(1), 93–117, 2009.

Wang C., Weisberg R. H. and Virmani J. I.: Western Pacific interannual variability associated with the El Niño–Southern Oscillation, *J. Geophys. Res.*, 104, 5131–5149, 1999b.

Wang, L., W. Chen, and R. H. Huang: Interdecadal modulation of PDO on the impact of ENSO on the east Asian winter monsoon, *Geophys. Res. Lett.*, 35, L20702, doi:10.1029/2008GL035287, 2008.

Wang L.: Intelligent Optimization Algorithms and Its Application, pp. 23–24, Tsinghua University Press, Chendu, 2001.

Wang W., Su J. Y., Hou B. W. et al.: Dynamic prediction of building subsidence deformation with data-based mechanistic self-memory model, *Chinese Science Bulletin*, 57(26), 3430–3435, 2012.

Webster P. J., Moore A. M., Loschnigg J. P., et al.: Coupled ocean-atmosphere dynamics in the Indian Ocean during 1997–98, *Nature*, 401(6751), 356–360, 1999.

Weinberger K. Q. and L. Saul: Unsupervised learning of image manifolds by semidefinite programming, *Int. J. Comput. Vision.*, 70, 77–90, 2006.

Xu J. J. and Wang D. X.: Diagnosis of interannual and interdecadal variation in SST over Indian-Pacific Ocean and numerical simulation of their effect on Asian summer monsoon, *Acta Oceanologica Sinica*, 22(3), 34–43, 2000.

Yang, S., K. M. Lau, and K. M. Kim: Variations of the East Asian jet stream and Asian-Pacific American winter climate anomalies, *J. Climate*, 15, 306–325, 2002.

Yim SY, Wang B, Kwon M: Interdecadal change of the controlling mechanisms for East Asian early summer rainfall variation around the mid-1990s, *Clim Dyn.*, 42, 1325–1333, 2013.

Yim, S.-Y., B. Wang, W. Xing, M.-M. Lu: Prediction of Meiyu rainfall in Taiwan by multi-lead physical-empirical models, *Clim. Dyn.*, 44 (11–12), 3033–3042, doi:10.1007/s00382-014-2340-0, 2015.

Yoon, J., and S. W. Yeh: Influence of the Pacific Decadal Oscillation on the relationship between El Niño and the northeast Asian summer monsoon, *J. Climate*, 23, 4525–4537, 2010.

Yu H., J. Huang, and J. Chou: Improvement of Medium-Range Forecasts Using the Analogue Dynamical Method, *Mon. Wea. Rev.*, 142, 1570–1587, doi: <http://dx.doi.org/10.1175/MWR-D-13-00250.1>, 2014a.

Yu H., J. Huang, W. Li, and G. Feng: Development of the analogue dynamical method for error correction of numerical forecasts, *J. Meteor. Res.*, 28(5), 934–947, doi: 10.1007/s13351-014-4077-4, 2014b.

Zhang R. and Hong M., et al.: Non-linear Dynamic Model Retrieval of Subtropical High Based on Empirical Orthogonal Function and Genetic Algorithm, *Applied Mathematics and Mechanics*, 27(12), 1645–1654, 2006.

Zhang R. and Hong M., et al.: Retrieval of the non-linear dynamic forecast model of El Niño/La Niña index based on the genetic algorithm optimization. *Chinese Journal of Geophysics*, 51(5), 1354–1362, 2008.

Zhang R. H., Zhou G. Q. and Chao J. P.: ENSO Dynamics and Its Prediction, *Chinese Journal of Atmospheric Sciences*, 27(4), 674–688, 2003.

Zhang, R. H., A. Sumi, and M. Kimoto: Impact of El Niño on the East Asian monsoon: A diagnostic

域代码已更改



study of the '86/87 and '91/92 events, *J. Meteor. Soc. Japan*, 74, 49–62, 1996.

Zhao J. H., Liu X. Y. and Jiang H. Y., et al.: Characteristics of Sea Surface Height in Tropical Pacific and its relationship with ENSO events, *Meteorological and Environmental Sciences*, 35(2), 33–39, 2012.

Zhou, L. T., and R. G. Wu: Respective impacts of the East Asian winter monsoon and ENSO on winter rainfall in China, *J. Geophys. Res.*, 115, doi: 10.1029/2009JD012502, 2010.

#### List of Figures:

**Fig.1(a, c) First and second modes of the EOF deconstruction of the SSTA field, and (b, d) the corresponding PC time series.**

~~The time series (a) and the spatial mode (b) of the first mode; the time series(c) and the spatial mode (d) of the second mode of the SSTA filed~~

**Fig. 2** Forecast results of the first time coefficient series (a) and the second time coefficient series (b) of the SSTA field by the original model

**Fig. 3.** The cross-validated retroactive hindcast results of the first time coefficient series (a) and the second time coefficient series (b) of the SSTA field by the original model

**Fig. 4.** Long-term step-by-step forecast results of the first time coefficient series (a) and the second time coefficient series (b) of the SSTA field by the improved model

**Fig. 5.** The cross-validated retroactive hindcast results of the first time coefficient series (a) and the second time coefficient series (b) of the SSTA field by the improved model

**Fig. 6.** The forecast SSTA field (a) and the actual SSTA field (b) of an El Niño event (Dec.1997)

**Fig. 7.** The forecast SSTA field (a) and the actual SSTA field (b) of a La Niña event (Dec.1999)

**Fig. 8.** The forecast SSTA field (a) and the actual SSTA field (b) of neutral event (Nov.2002)

**Fig. 9.** The improved dynamical-statistical model prediction of the ENSO index

~~**Fig.10.** The cumulative correlation coefficients (a) and cumulative mean absolute percentage error (b) changing with time of different lead times~~

~~**Fig. 11**~~**Fig. 10.** Temporal correlation between model forecasts and observations for all seasons combined, as

1326 a function of lead time. Each line highlights one model.  
1327 **Fig.4211.** RMSE in standardized units, as a function of lead time for all seasons combined. Each line  
1328 highlights one model.

1329  
1330  
1331  
1332  
1333  
1334  
1335  
1336

1337 **Table captions:**

1338 **Table 1.** The correlation analysis between the front two time series  $T_1, T_2$  and nine impact factors

1339 ~~Table 1.~~ Forecast results of models of different variables

1340 **Table2.** The CC and MAPE of long-term fitting test when the retrospective order  $p$  is different

1341 ~~Table 2.~~ The correlation coefficient (CC) and Mean absolute percentage error (MAPE) of long term  
1342 ~~fitting test when the retrospective order  $p$  is different~~

1343 **Table3.** The forecast results of  $T_1$  and  $T_2$  in different examples within 6 and 12 months

1344 **Table. 4.** The TC and the MAPE between model forecasts and observations within 12 months for  
1345 Nov.–Jan., Dec.–Feb., and Jan.–Mar. as lead time of winter, for Feb.–Apr. , Mar.–May and Apr.–June as  
1346 lead time of spring, for May-July, June-August and July-Sep. as lead time of summer and for  
1347 August-Oct., Sep.-Nov. and Oct.-Dec. as lead time of autumn.

1348 ~~Table4.~~ Temporal correlation (CC) and the mean absolute percentage error (MAPE) between model  
1349 ~~forecasts and observations within 12 months for November–January–December–February, and~~  
1350 ~~January–March as lead time of winter and for May July, June–August and July Sep. as lead time of~~  
1351 ~~summer.~~

1352 **Table5.** The forecast results of the different data periods~~Table 5.~~ The correlation coefficients among  
1353 ~~four factors~~

1354

1355 **Figure:**

带格式的：字体：加粗

带格式的：缩进：首行缩进： 0 字  
符，行距：单倍行距

带格式的：行距：单倍行距

带格式的：行距：单倍行距

带格式的：制表位： 3.21 字符，  
左对齐 + 8.72 字符，左对齐 +  
13.09 字符，左对齐 + 17.45 字  
符，左对齐 + 21.81 字符，左  
对齐 + 26.17 字符，左对齐 +  
30.53 字符，左对齐 + 34.9 字  
符，左对齐 + 39.26 字符，左  
对齐 + 43.62 字符，左对齐 +  
47.98 字符，左对齐 + 52.34 字  
符，左对齐 + 56.7 字符，左对齐  
+ 61.07 字符，左对齐 + 65.43  
字符，左对齐 + 69.79 字符，左  
对齐

带格式的

带格式的：行距：单倍行距

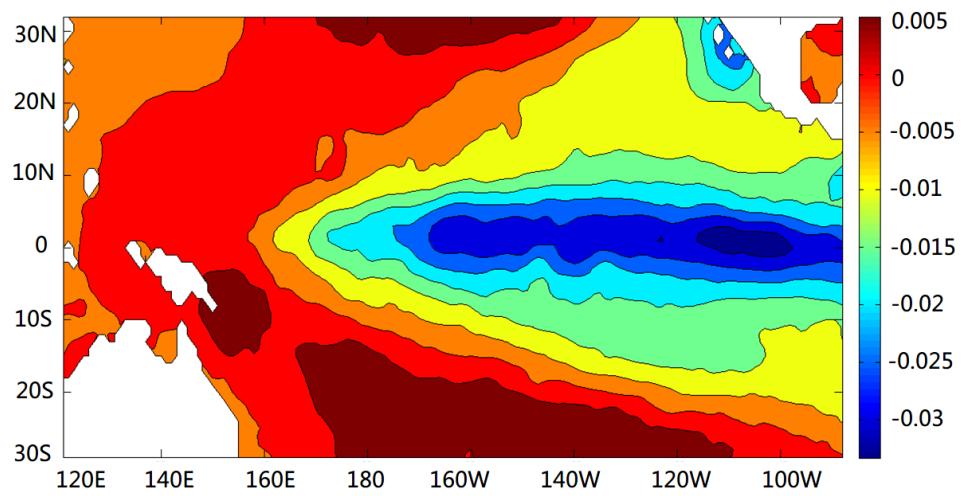

(a)

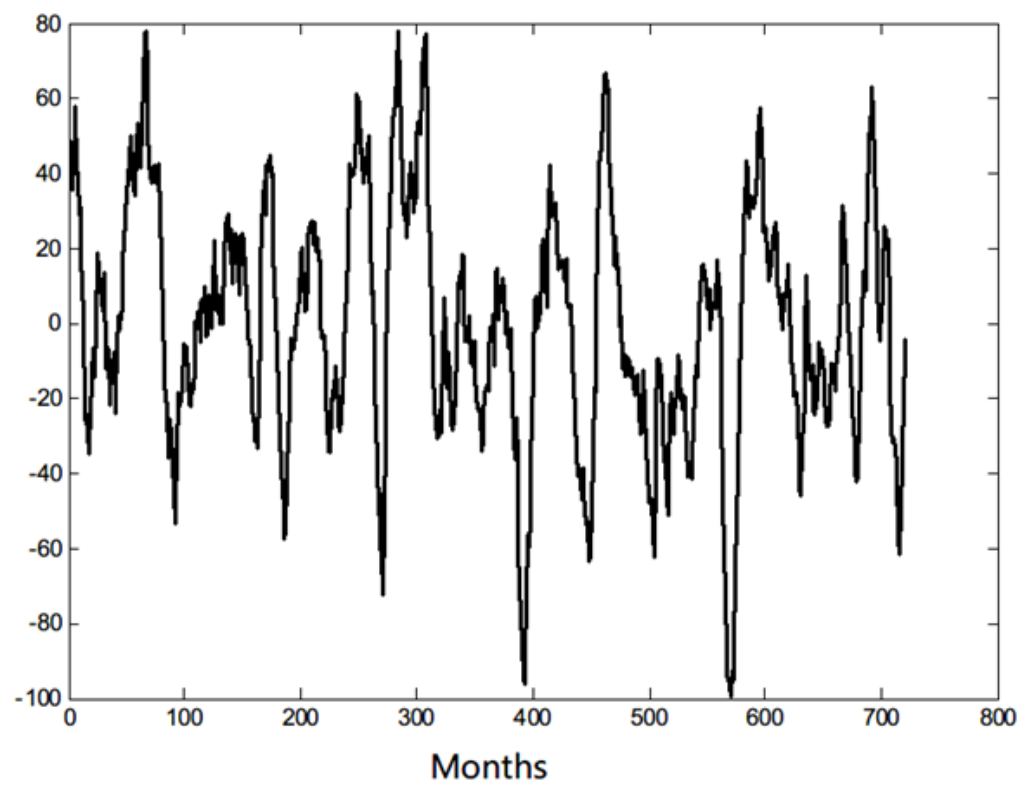

(b)

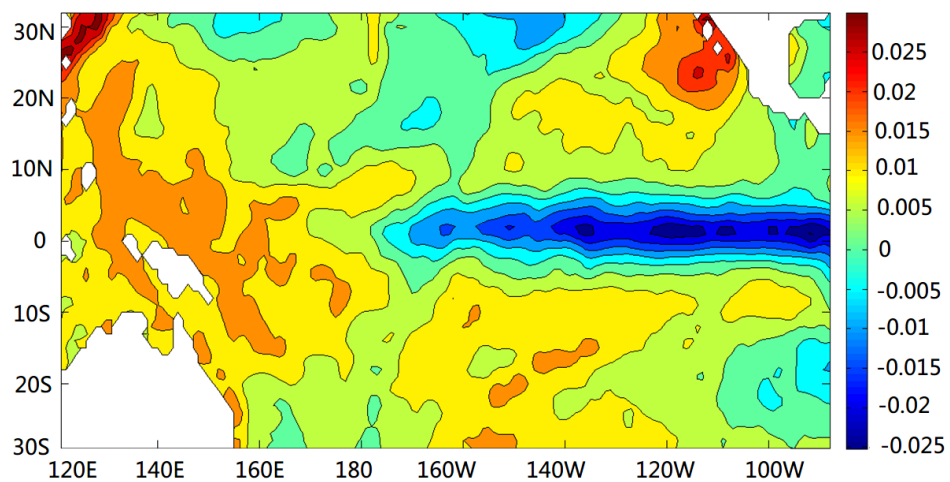

(c)

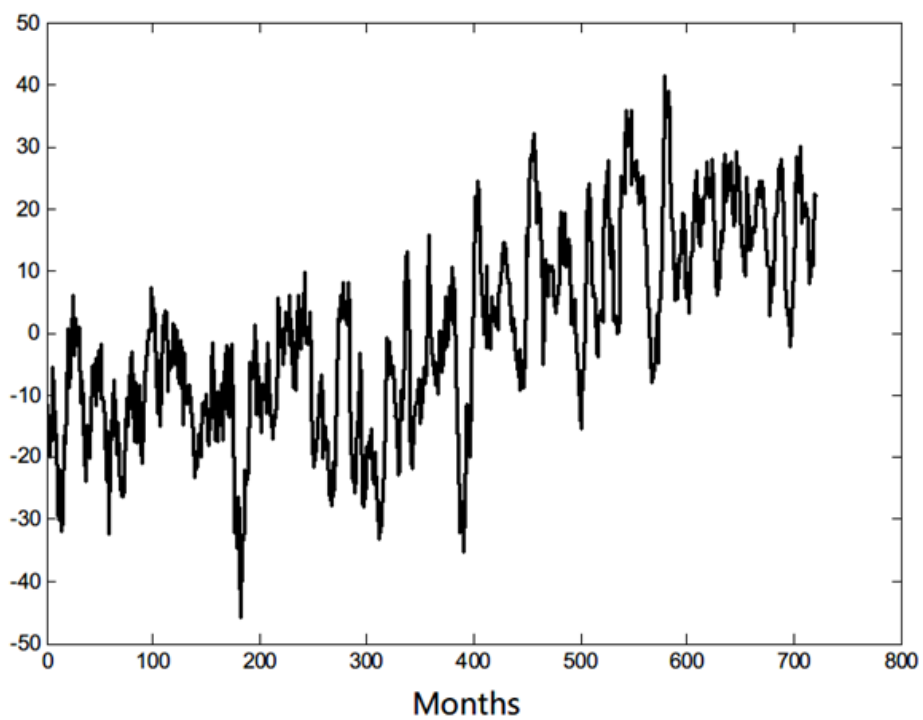

(d)

**Fig. 1** (a, c) First and second modes of the EOF decomposition of the SSTA field, and (b, d) the corresponding PC time series.

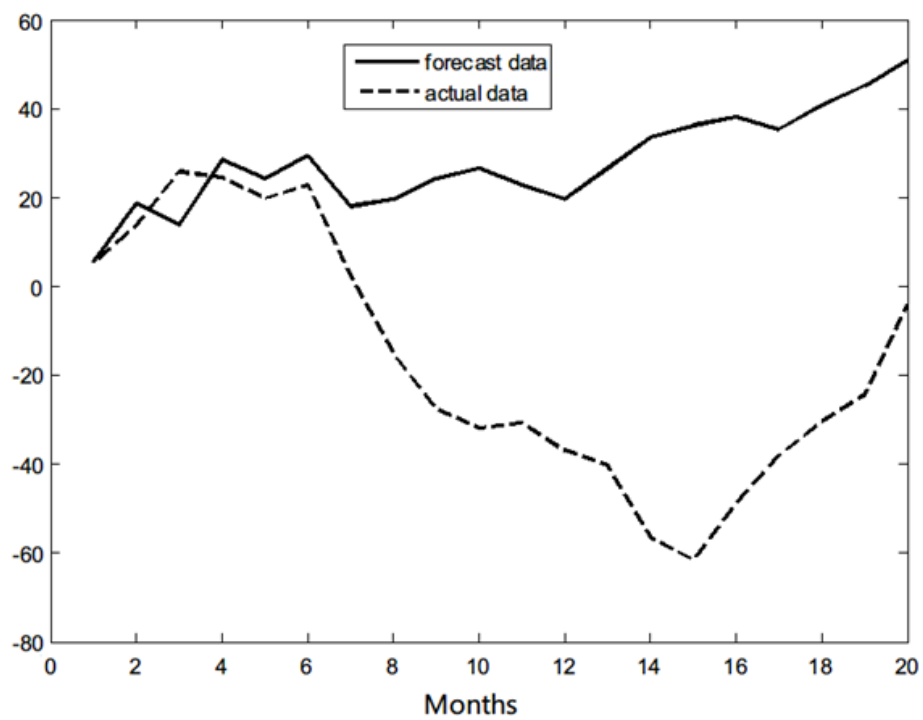

(a)

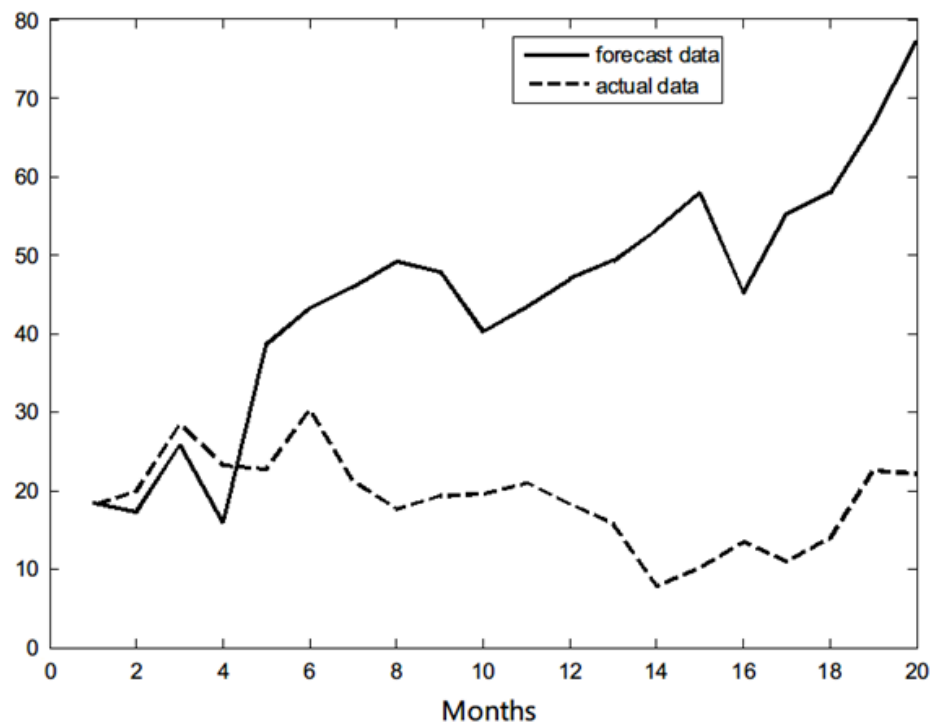

1369  
1370  
1371  
1372  
1373  
1374  
1375  
1376  
1377  
1378  
1379  
1380  
1381  
1382

(b)

Fig.2 Forecast results of the first time coefficient series  $T_1$  错误!未找到引用源。 (a) and the second time coefficient series  $T_2$   ~~$T_2$~~  (b) of the SSTA field by the original model

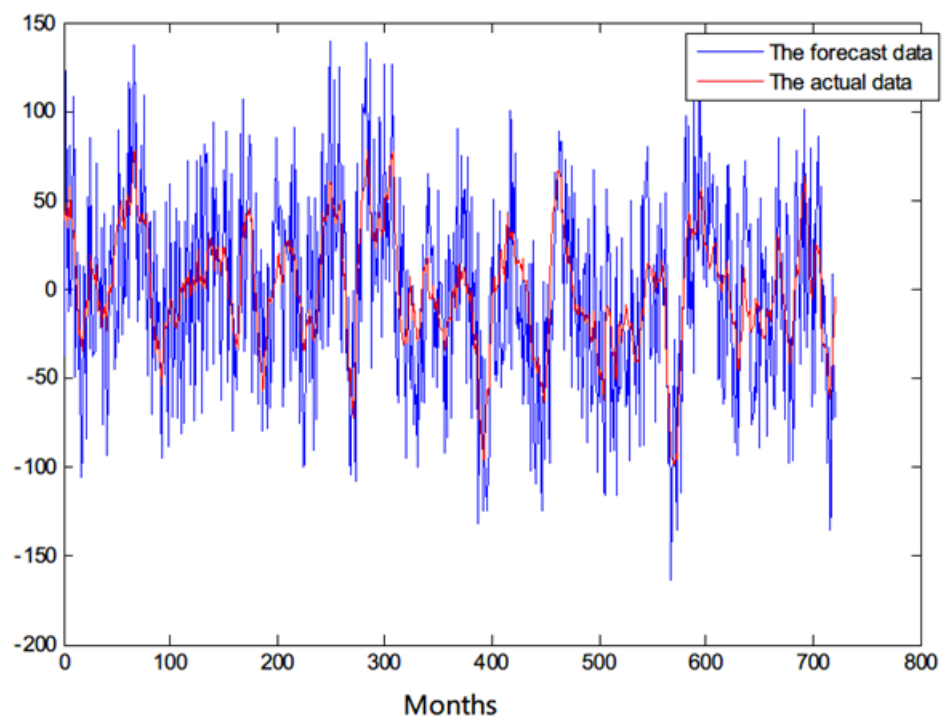

1383

1384

(a)

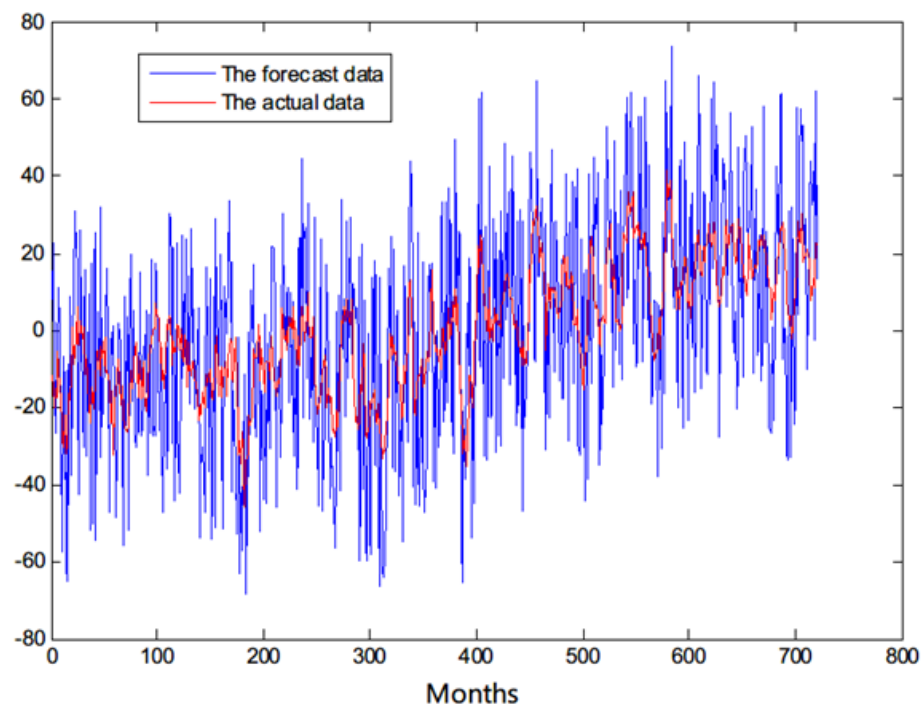

1385

1386  
1387  
1388  
1389  
1390  
1391  
1392  
1393  
1394  
1395  
1396  
1397

(b)

Fig.3The cross-validated retroactive hindcast results of the first time coefficient series  $\underline{T_1}$   ~~$T_1$~~  (a)and  
the second time coefficient series  $\underline{T_2}$   ~~$T_2$~~  (b)of the SSTA field by the original model



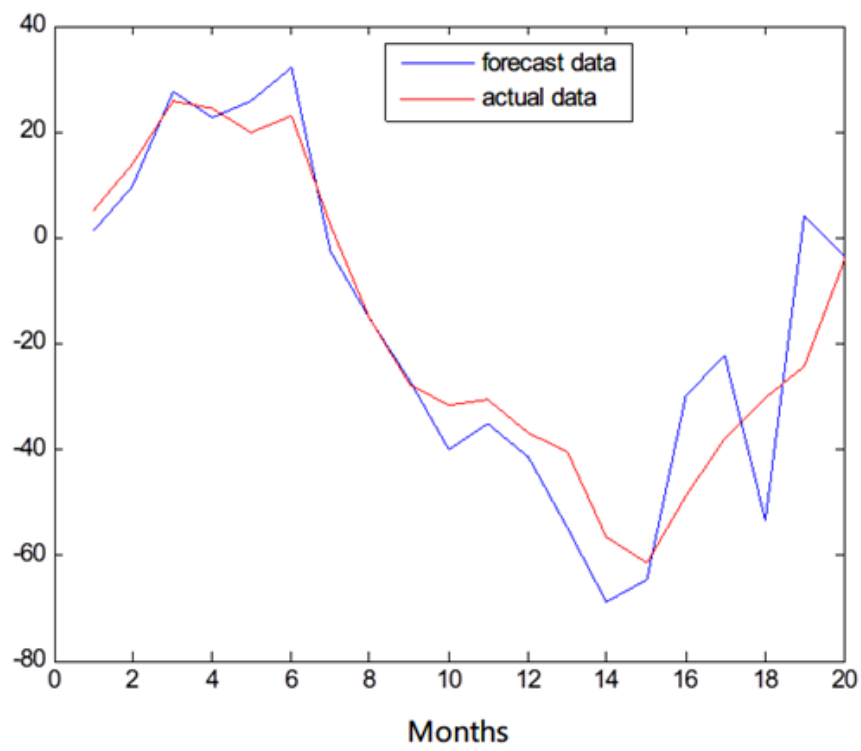

1398

1399

(a)

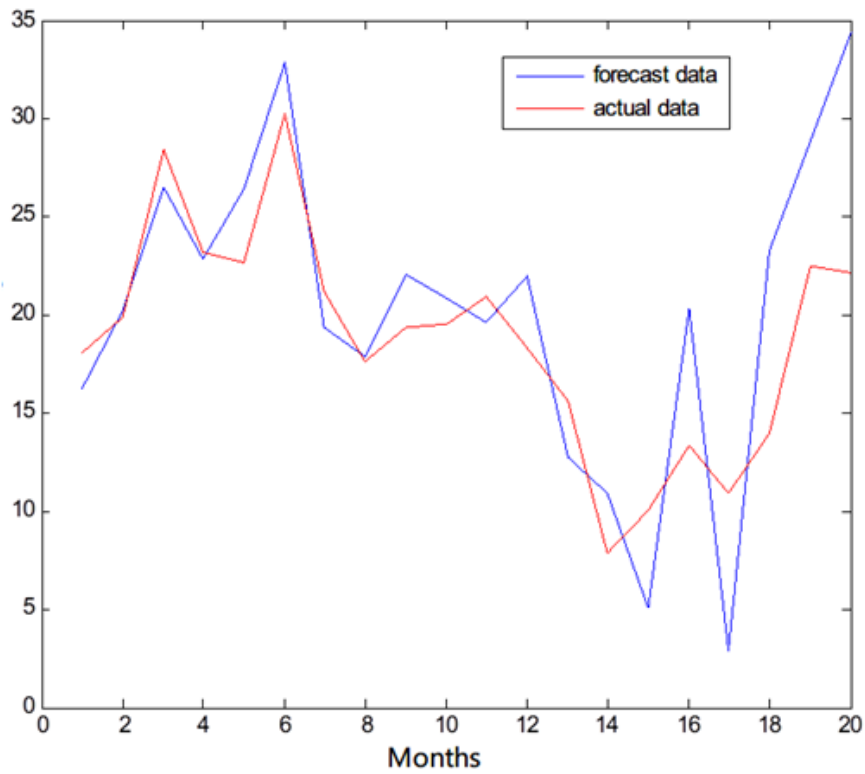

(b)

Fig. 4. Long-term step-by-step forecast results of the first time coefficient series  $\underline{T_1} \overline{T_1}$  (a) and the second time coefficient series  $\underline{T_2} \overline{T_2}$  (b) of the SSTA field by the improved model

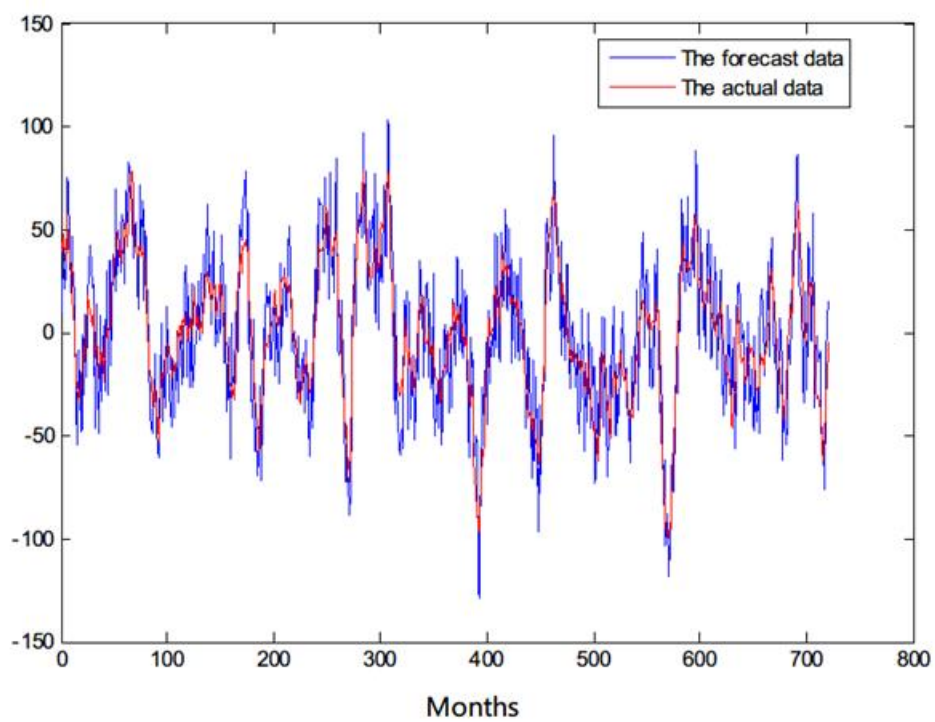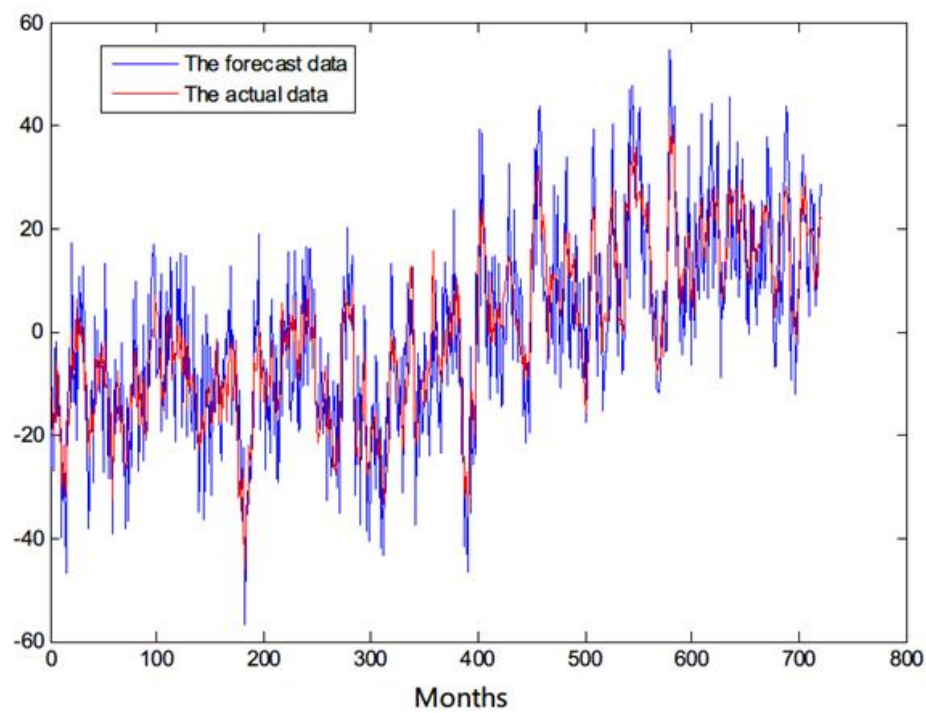

1408  
1409  
1410  
1411  
1412  
1413  
1414  
1415  
1416  
1417  
1418

(b)

Fig. 5. The cross-validated retroactive hindcast results of the first time coefficient series  $T_1$  (a) and the second time coefficient series  $T_2$  (b) of the SSTA field by the improved model

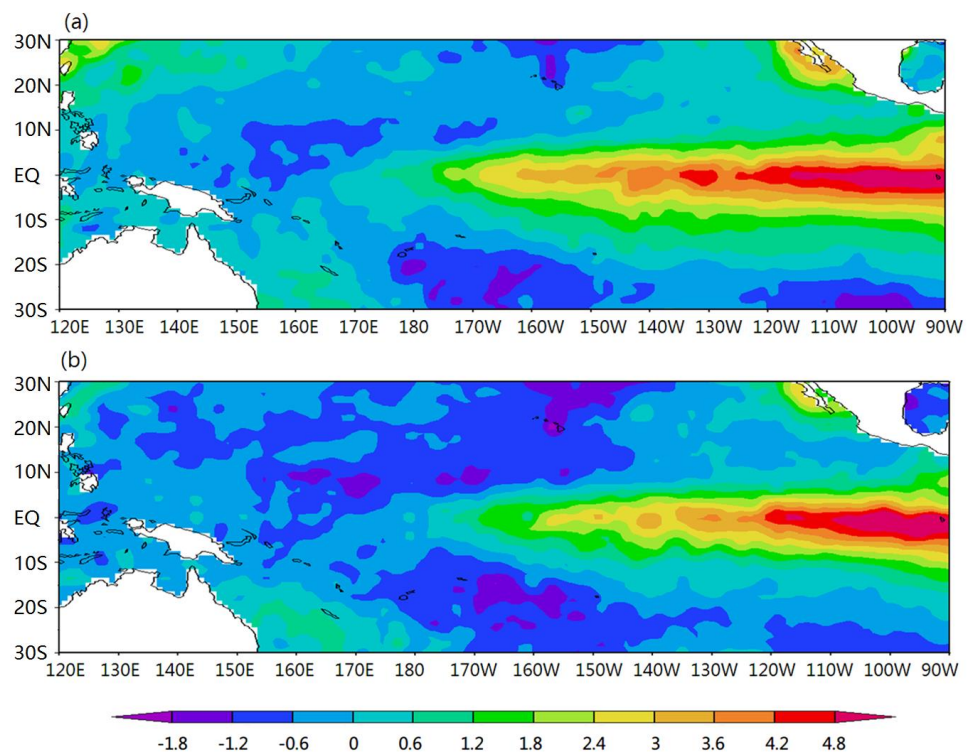

Fig.6. The forecast SSTA field(a) and the actual SSTA field (b)of an El Niño event (Dec.1997)

1429

1430

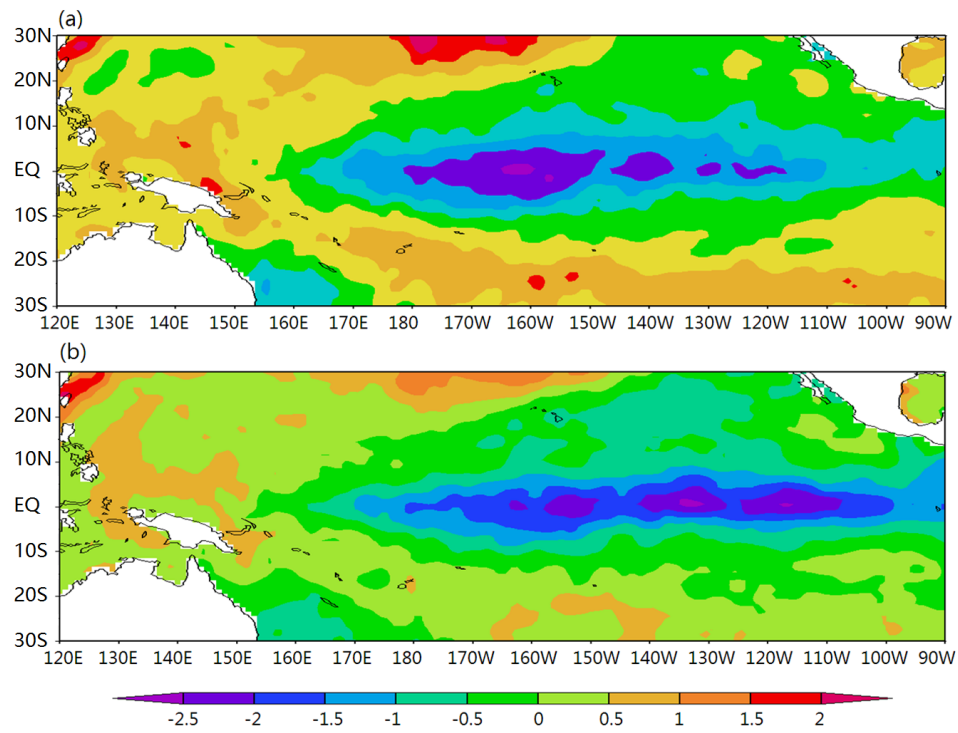

1431

1432 Fig.7. The forecast SSTA field(a) and the actual SSTA field (b)of a La Niña event (Dec.1999)

1433

1434

1435

1436

1437

1438

1439

1440

1441

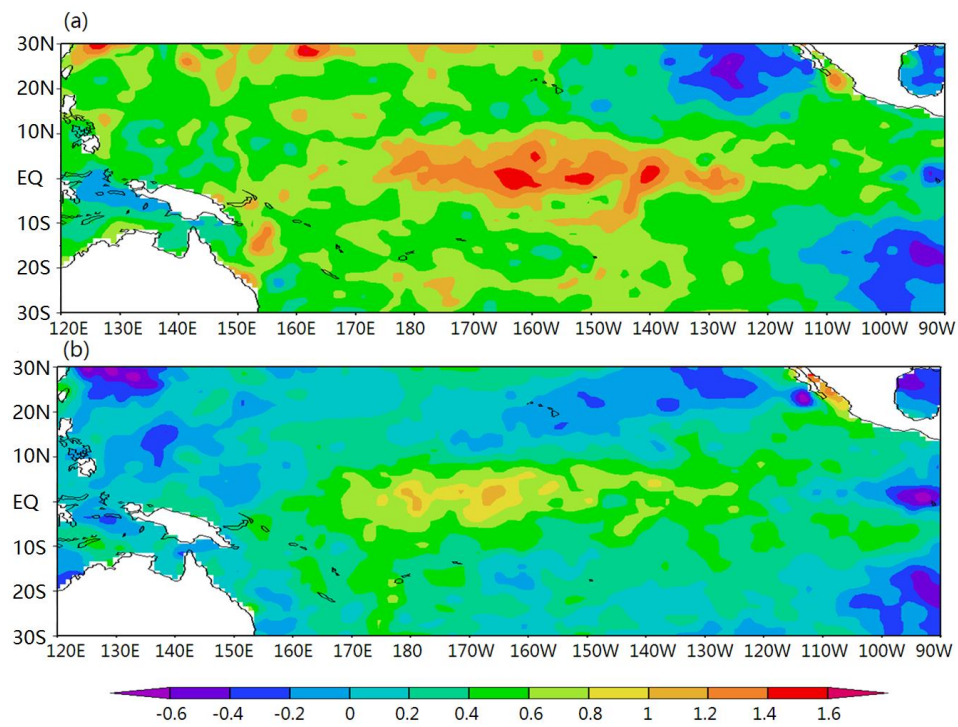

1442

1443 Fig.8. The forecast SSTA field(a) and the actual SSTA field (b)of neutral event (Nov.2002)

1444

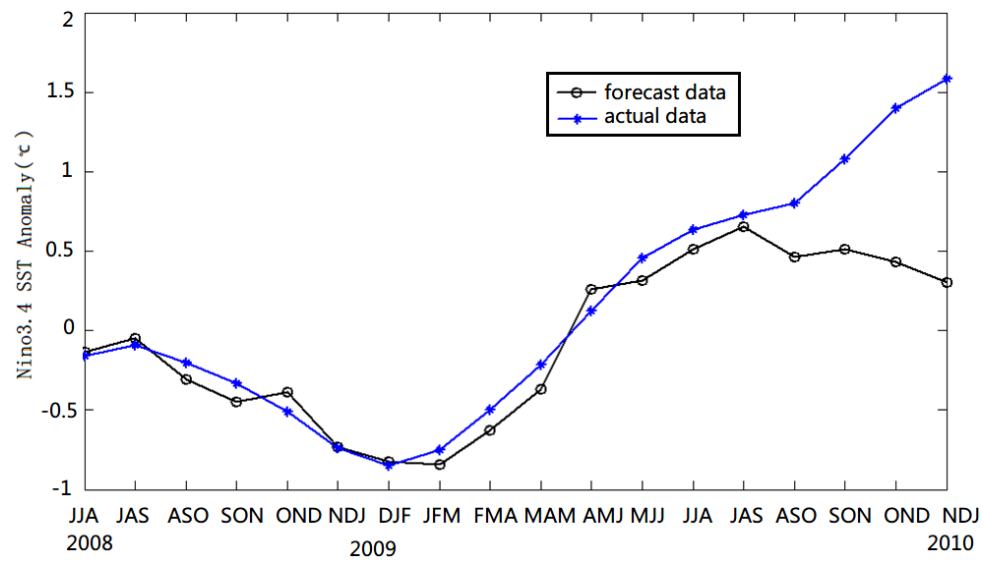

Fig.9. The improved dynamical-statistical model prediction of the ENSO index



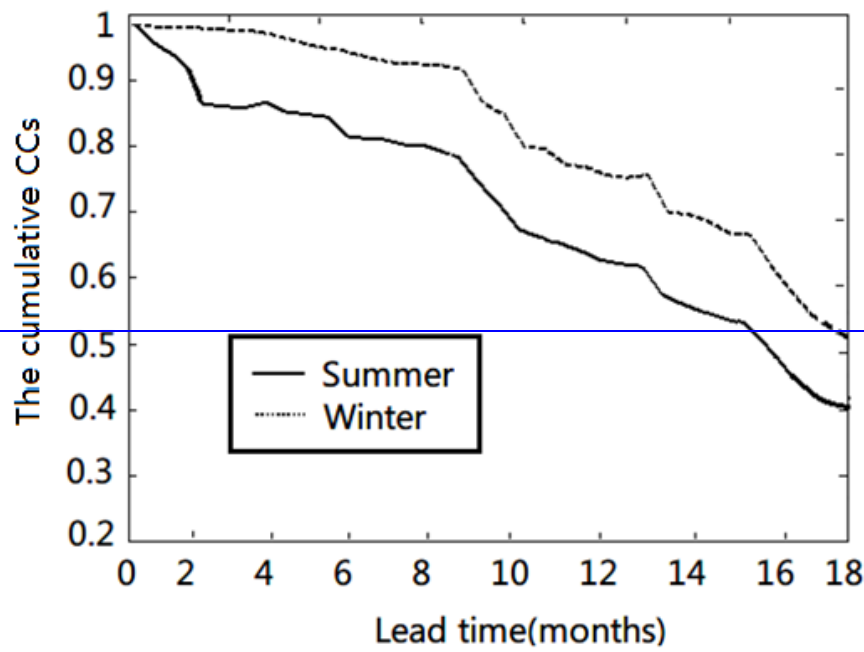

(a)

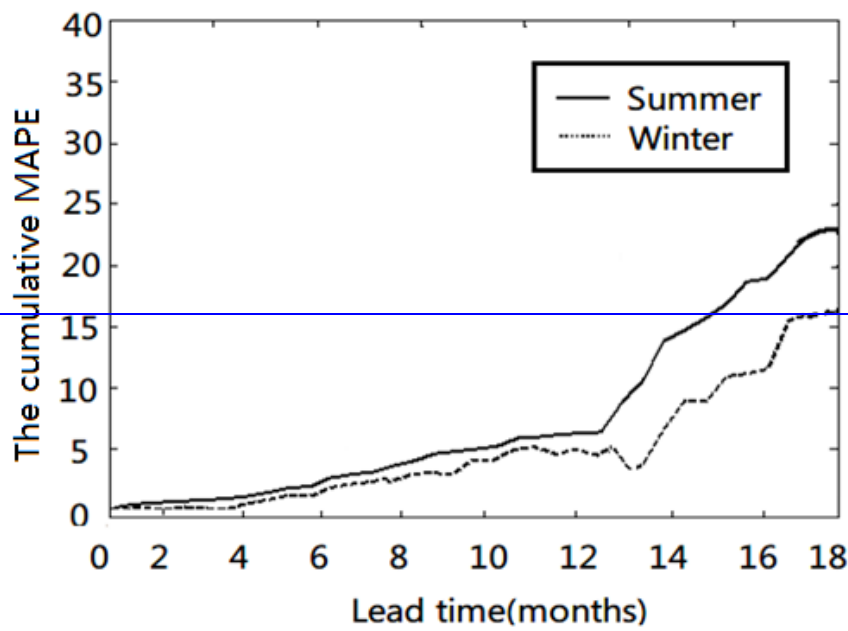

(b)

Fig.10. The cumulative correlation coefficients(CCs) (a) and cumulative mean absolute percentage error(MAPE) (b) changing with time of different lead times

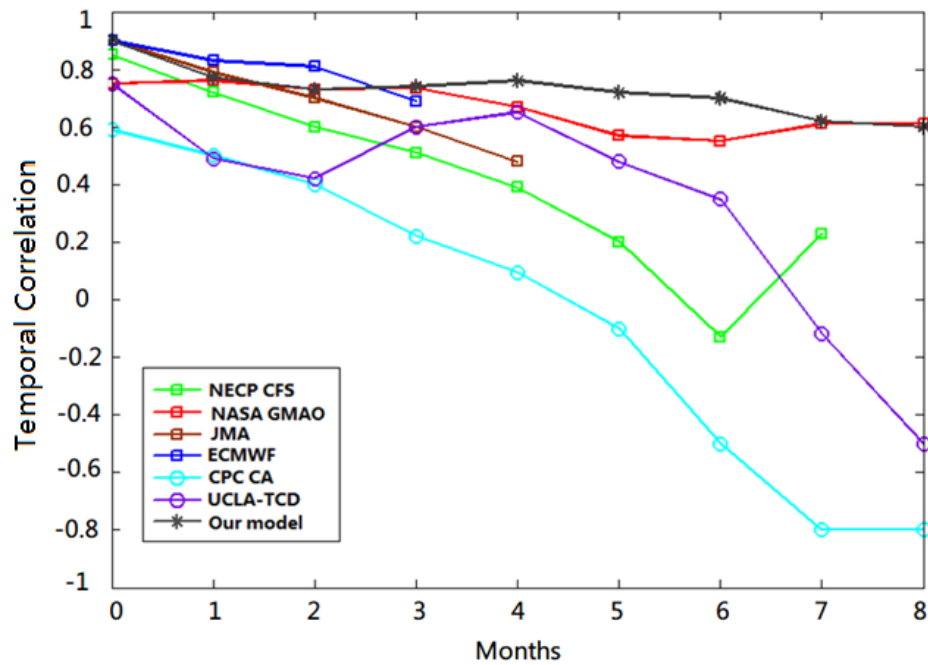

Fig. 4410. Temporal correlation between model forecasts and observations for all seasons combined, as a function of lead time. Each line highlights one model.

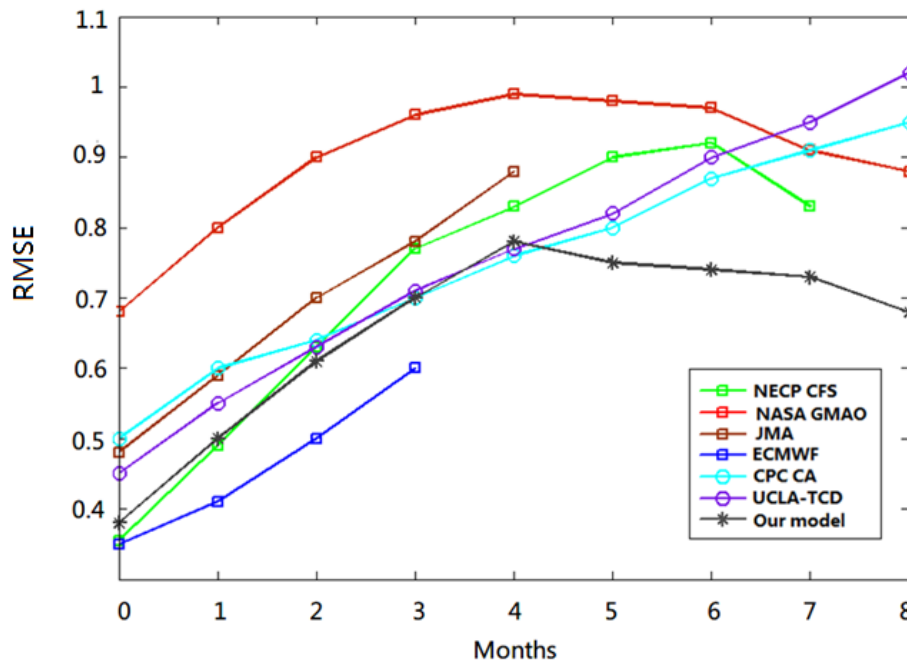

Fig . 4211. RMSE in standardized units, as a function of lead time for all seasons combined. Each line highlights one model.

1494

1495 **Table:**

1496 Table 1. The correlation analysis between the front two time series  $T_1, T_2$  and nine impact factors

| <u>factors</u>          | <u><math>u_1</math></u> | <u><math>u_2</math></u> | <u>PNA</u>    | <u>DMI</u>     | <u>SOI</u>    | <u>PDOI</u>   | <u>EAWMI</u>  | <u>OLR</u>    | <u>SSH</u>    |
|-------------------------|-------------------------|-------------------------|---------------|----------------|---------------|---------------|---------------|---------------|---------------|
| <u><math>T_1</math></u> | <u>0.3161</u>           | <u>0.5684</u>           | <u>0.4386</u> | <u>-0.3457</u> | <u>0.7734</u> | <u>0.4081</u> | <u>0.6284</u> | <u>0.3287</u> | <u>0.3363</u> |
| <u><math>T_2</math></u> | <u>0.2118</u>           | <u>0.4181</u>           | <u>0.2560</u> | <u>-0.2345</u> | <u>0.5232</u> | <u>0.3065</u> | <u>0.4825</u> | <u>0.1816</u> | <u>0.2169</u> |

1497

1498 Table1. The forecast results of the models of different variables

| <u>The model</u>                                                   | <u>The forecast skill of 60 cross-validated retroactive hindcasts-experiments of the ENSO index for all seasons combined at lead times of 8 months</u> |                                   |
|--------------------------------------------------------------------|--------------------------------------------------------------------------------------------------------------------------------------------------------|-----------------------------------|
|                                                                    | <u>the temporal correlation</u>                                                                                                                        | <u>the root mean square error</u> |
| <u>One variable (<math>T_1</math>)</u>                             | <u>0.5051</u>                                                                                                                                          | <u>0.8075</u>                     |
| <u>Two variables (<math>T_1, T_2</math>)</u>                       | <u>0.5613</u>                                                                                                                                          | <u>0.7679</u>                     |
| <u>Three variables (<math>T_1, T_2, SOI</math>)</u>                | <u>0.6027</u>                                                                                                                                          | <u>0.7275</u>                     |
| <u>Four variables (<math>T_1, T_2, SOI, EAWMI</math>)</u>          | <u>0.6344</u>                                                                                                                                          | <u>0.6728</u>                     |
| <u>Five variables (<math>T_1, T_2, SOI, EAWMI, u_1</math>)</u>     | <u>0.5923</u>                                                                                                                                          | <u>0.7344</u>                     |
| <u>Six variables (<math>T_1, T_2, SOI, EAWMI, u_1, PNA</math>)</u> | <u>0.5528</u>                                                                                                                                          | <u>0.7806</u>                     |

1499

1500

1501

1502

1503

1504

1505

1506

1507

1508

1509

1510

1511

1512

1513

带格式的: 字体: Times New Roman, 字体颜色: 自动设置

带格式的: 字体: Times New Roman, 10 磅, 字体颜色: 自动设置

带格式的: 字体: Times New Roman, 10 磅, 字体颜色: 自动设置

带格式的: 字体: Times New Roman, 10 磅, 字体颜色: 自动设置

带格式的: 字体: Times New Roman, 10 磅, 字体颜色: 自动设置

带格式的: 字体: Times New Roman, 10 磅, 字体颜色: 自动设置

带格式的: 字体: Times New Roman, 10 磅, 字体颜色: 自动设置

带格式的: 字体: Times New Roman, 10 磅, 字体颜色: 自动设置

带格式表格

带格式的: 字体: Times New Roman, 10 磅, 字体颜色: 自动设置

带格式的: 字体: Times New Roman, 10 磅, 字体颜色: 自动设置

带格式的

1514  
1515  
1516  
1517  
1518  
1519  
1520  
1521  
1522  
1523  
1524  
1525  
1526  
1527  
1528  
1529  
1530  
1531

1532 **Table 2.** The correlation coefficient (CC) and Mean absolute percentage error (MAPE) of long-term  
1533 fitting test when the retrospective order  $p$  is different

| $p$                                                        |      | 4      | 5      | 6      | 7      | 8      | 9      | 10     |
|------------------------------------------------------------|------|--------|--------|--------|--------|--------|--------|--------|
| The<br>forecast<br>results of<br>long-term<br>fitting test | CC   | 0.75   | 0.73   | 0.81   | 0.74   | 0.70   | 0.72   | 0.68   |
|                                                            | MAPE | 18.42% | 19.36% | 14.56% | 20.39% | 25.31% | 24.18% | 27.33% |
| $p$                                                        |      | 11     | 12     | 13     | 14     | 15     | 16     |        |
| The<br>forecast<br>results of<br>long-term<br>fitting test | CC   | 0.68   | 0.70   | 0.65   | 0.62   | 0.60   | 0.62   |        |
|                                                            | MAPE | 28.10% | 26.58% | 30.91% | 33.14% | 34.97% | 33.56% |        |

1534  
  
1535  
  
1536  
  
1537  
  
1538

1539

1540

1541

1542

1543

1544

1545

1546

1547

1548

1549      **Table3.** The forecast results of  $T_1$  and  $T_2$  in different examples within 6 and 12 months

| Forecast events                             | The results within<br>6-months |       | The results within<br>12-months |        |
|---------------------------------------------|--------------------------------|-------|---------------------------------|--------|
|                                             | CC                             | MAPE  | CC                              | MAPE   |
| The average of 18 El Niño examples of $T_1$ | 0.824                          | 8.45% | 0.719                           | 12.67% |
| The average of 22 La Niña examples of $T_1$ | 0.846                          | 7.68% | 0.740                           | 11.28% |
| The average of 20 Neutral examples of $T_1$ | 0.885                          | 6.23% | 0.789                           | 9.85%  |
| The average of total 60 examples of $T_1$   | 0.850                          | 7.41% | 0.748                           | 10.95% |
| The average of 18 El Niño examples of $T_2$ | 0.811                          | 8.79% | 0.703                           | 13.28% |
| The average of 22 La Niña examples of $T_2$ | 0.833                          | 7.35% | 0.731                           | 11.96% |
| The average of 20 Neutral examples of $T_2$ | 0.896                          | 6.68% | 0.795                           | 10.08% |

|                                           |       |       |       |        |
|-------------------------------------------|-------|-------|-------|--------|
| The average of total 60 examples of $T_2$ | 0.842 | 7.64% | 0.740 | 11.71% |
|-------------------------------------------|-------|-------|-------|--------|

1550

1551

1552

1553

1554

1555

1556

1557

1558

1559

1560

1561 Table. 4. The TC and the MAPE between model forecasts and observations within 12 months for  
1562 Nov.–Jan., Dec.–Feb., and Jan.–Mar. as lead time of winter, for Feb.–Apr., Mar.–May and Apr.–June as  
1563 lead time of spring, for May–July, June–August and July–Sep. as lead time of summer and for  
1564 August–Oct., Sep.–Nov. and Oct.–Dec. as lead time of autumn.

| Forecast events                    | Lead time of all seasons combined |       | Lead time of summer (MJJ-JJA-JAS) |            | Lead time of autumn (ASO-SON-ON D) |       | Lead time of winter (NDJ-DJF-JF M) |       | Lead time of spring (FMA-MAM-AM J) |       |
|------------------------------------|-----------------------------------|-------|-----------------------------------|------------|------------------------------------|-------|------------------------------------|-------|------------------------------------|-------|
|                                    | ETC                               | MAP E | ETC                               | MAPE       | ETC                                | MAPE  | ETC                                | MAPE  | ETC                                | MAPE  |
| The average of 18 El Niño examples | 0.60<br>4                         | 9.70% | 0.56<br>9                         | 10.33<br>% | 0.632                              | 8.85% | 0.67<br>7                          | 8.02% | 0.538                              | 11.6% |
| The average of 22 La Niña examples | 0.62<br>5                         | 8.97% | 0.58<br>1                         | 9.82%      | 0.645                              | 8.41% | 0.69<br>5                          | 7.83% | 0.579                              | 9.82% |

带格式的

带格式的: 字体: Times New Roman, 10 磅

带格式的

带格式的

带格式的

带格式的

带格式的

|                                          |           |       |           |       |       |       |           |       |       |       |
|------------------------------------------|-----------|-------|-----------|-------|-------|-------|-----------|-------|-------|-------|
| The average of<br>20 Neutral<br>examples | 0.79<br>8 | 5.96% | 0.75<br>2 | 6.86% | 0.831 | 5.31% | 0.84<br>4 | 4.60% | 0.765 | 7.07% |
| The average of<br>total 60<br>examples   | 0.71<br>2 | 7.62% | 0.63<br>3 | 8.51% | 0.786 | 6.88% | 0.77<br>6 | 6.52% | 0.653 | 8.03% |

**Table. 4.** Temporal correlation(CC) and the mean absolute percentage error (MAPE) between model forecasts and observations within 12 months for Nov-Jan, Dec-Feb, and Jan-Mar as lead time of winter and for May-July, June-August and July-Sep. as lead time of summer.

| Forecast events                    | Lead time of all seasons combined |       | Lead time of summer (MJJ-JJA-JAS) |        | Lead time of winter (NDJ-DJF-JFM) |       |
|------------------------------------|-----------------------------------|-------|-----------------------------------|--------|-----------------------------------|-------|
|                                    | CC                                | MAPE  | CC                                | MAPE   | CC                                | MAPE  |
|                                    |                                   |       |                                   |        |                                   |       |
| The average of 18 El Niño examples | 0.604                             | 9.70% | 0.569                             | 10.33% | 0.677                             | 8.02% |
| The average of 22 La Niña examples | 0.625                             | 8.97% | 0.581                             | 9.82%  | 0.695                             | 7.83% |
| The average of 20 Neutral examples | 0.798                             | 5.96% | 0.752                             | 6.86%  | 0.844                             | 4.60% |
| The average of total 60 examples   | 0.712                             | 7.62% | 0.633                             | 8.51%  | 0.776                             | 6.52% |

带格式的：字体：10 磅





|          |       |       |       |       |
|----------|-------|-------|-------|-------|
| $\tau_1$ |       | 0.419 | 0.401 | 0.337 |
| $\tau_2$ | 0.419 |       | 0.424 | 0.356 |
| SOI      | 0.401 | 0.424 |       | 0.408 |
| EAWMI    | 0.337 | 0.356 | 0.408 |       |

带格式表格

1585

1586
